# Supplementary material for: Comparison of precipitation measurements by Ott Parsivel 2 andThies LPM optical disdrometers
Source: Copernicus journal article supplement (doi:10.5194/hess-2017-652), 2017-11-14
Supplement: Supplementary file [file hess-2017-652-AC3-supplement.pdf]

## Research Highlights

- An analysis of almost 100,000 one-minute precipitation observations recorded by two types of optical disdrometer, Thies LPM and OTT Parsivel<sup>2</sup>, is presented.
- Disdrometer data processing was made by a custom software developed for R environment which overcome binning differences when calculating particle size distribution statistics, allowing for disdrometer type comparison.
- Thies LPM recorded on average double number of particles than OTT Parsivel<sup>2</sup>, with a greater number of small particles resulting in kinetic energy underestimation.
- Differences between disdrometer type increased with precipitation intensity, with Thies LPM recording nine times higher number of particles than OTT Parsivel<sup>2</sup>, influencing all precipitation variables.

# Comparison of precipitation measurements by OTT Parsivel<sup>2</sup> and Thies LPM optical disdrometers

Marta Angulo-Martínez<sup>a</sup>, Santiago Beguería<sup>a,\*</sup>, Borja Latorre<sup>a</sup>, María Fernández-Raga<sup>b</sup>

<sup>a</sup>*Experimental Station of Aula Dei, Consejo Superior de Investigaciones Científicas (EEAD-CSIC), Avda. Montanana 1005, Zaragoza, E-50059, Spain*

<sup>b</sup>*Dept. of Physics, University of Leon, Spain*

---

## Abstract

Optical disdrometers are present weather sensors with the ability of providing detailed information of precipitation such as rain intensity, radar reflectivity or kinetic energy, together with discrete information on the particle size and fall velocity distribution (PSVD) of the hydrometeors. Disdrometers constitute a step forward towards a more complete characterization of precipitation, being useful in several research fields and applications. In this article the performance of two extensively used optical disdrometers, the most recent version of OTT Parsivel<sup>2</sup> disdrometer and Thies Clima Laser Precipitation Monitor (LPM), is evaluated. During two years four collocated optical disdrometers, two Thies Clima LPM and two OTT Parsivel<sup>2</sup>, collected up to 100,000 minutes of data and up to 30,000 minutes with rain in more than 200 rainfall events, with intensities peaking at 277 mm h<sup>-1</sup> in one minute. The analysis of these records show significant differences between both disdrometer types for all integrated precipitation parameters, which can be explained by differences in the raw particle size and velocity distri-

---

\*Correspondence to: [santiago.begueria@csic.es](mailto:santiago.begueria@csic.es)

bution (PSVD) estimated by the two sensors. Thies LPM recorded a larger number particles than Parsivel<sup>2</sup> and a higher proportion of small particles than OTT Parsivel<sup>2</sup>, resulting in higher rain rates and totals and differences in radar reflectivity and kinetic energy. These differences increased greatly with rainfall intensity. Possible causes of these differences, and their practical consequences, are discussed in order to help researchers and users in the election of the sensor, pointing out at the same time limitations to be addressed in future studies.

*Keywords:* Optical Disdrometer, Particle-size distribution, Precipitation measurement, Instrumental intercomparison, Rainfall kinetic energy

---

## 1. Introduction

Disdrometers are devices designed to measure the particle size distribution (PSD), or size and velocity distribution (PSVD), of falling hydrometeors. The PSD describes the statistical distribution of falling particle sizes from the number of particles with a given equi-volume diameter per unit volume of air. The PSVD includes also information about the distribution of the particle fall velocities.

Information on the PSD / PSVD is required for a proper understanding of hydrometeorological regimes (Iguchi et al., 2000; Krajewski et al., 2006; Adirosi et al., 2016), soil erosion (Sempere-Torres et al., 1998; Loik et al., 2004; Cruse et al., 2006; Petan et al., 2010; Fernández-Raga et al., 2010; Shuttleworth, 2012; Iserloh et al., 2013; Angulo-Martínez and Barros, 2015; Angulo-Martínez et al., 2016) and other applications such as pollution wash off in urban environments (Kathiravelu et al., 2016; Castro et al., 2010) or interactions of rainfall with crop and forest canopies (Frasson and Krajewski, 2011; Nanko et al., 2004; Nanko et al., 2013). Rainfall estimation by remote sensing, radar and satellite, also rely on PSD information (Olsen et al., 1978; Atlas et al., 1999; Uijlenhoet and Sempere-Torres, 2006; Tapiador

19 et al., 2017). Disdrometer observations of PSD are also used to derive re-  
20 lationships between radar reflectivity and rainfall rates (known usually as  
21 Z-R relationships), despite the difficulties due to differences in altitude of  
22 the measurement–surface vs. cloud base–and the sensing area—a few  $\text{cm}^2$  vs.  
23  $\text{km}^2$ —(Krajewski et al., 1998; Löffler-Mang and Blahak, 2001; Miriowsky et  
24 al., 2004; Thurai and Bringi, 2008; Marzano et al., 2010; Jaffrain and Berne,  
25 2012; Jameson et al., 2015; Raupach and Berne, 2016; Gires et al., 2016).  
26 Many of these studies took place within Precipitation Measurement Missions  
27 helping the development of better sensors and algorithms for precipitation  
28 detection and quantification; some examples are: Ioannidou et al. (2016) for  
29 the Tropical Rainfall Measurement Mission (TRMM), Liao et al. (2014) and  
30 Tan et al. (2016) for the Global Precipitation Measurement Mission (GPM),  
31 Adirosi et al. (2016) for the Hydrological cycle in the Mediterranean Exper-  
32 iment (HyMex), or Calheiros and Machado (2014) for the Cloud Processes  
33 of the Main Precipitation Systems in Brazil (CHUVA) campaign.

34 In addition, bulk precipitation variables can also be calculated from the  
35 PSD (sometimes called the ‘PSD moments’), including the rain rate, liquid  
36 water content, radar reflectivity, rainfall kinetic energy, among others (Ul-  
37 brich, 1983; Testud et al., 2001; Jameson and Kostinski, 1998). As such,  
38 disdrometers have been incorporated in operational meteorological networks  
39 as present weather sensors and pluviometers.

40 Current commercial disdrometers are based mainly on two physical princi-  
41 ples to measure the PSD or the PSVD. The first ones are electro-mechanical  
42 impact devices recording the electrical pulses produced by the pressure of  
43 falling drops when impacting over a surface. Impact disdrometers such as  
44 the Joss and Waldvogel disdrometer (JWD, Joss and Waldvogel, 1967) or  
45 piezoelectric force transducers (Jayawardena and Rezaur, 2000) were largely  
46 used in the 1980s and 90s. The JWD disdrometer gives good results for light  
47 to moderate intensity but underestimates the amount of small size drops dur-  
48 ing heavy rainfall events, and it cannot detect raindrops smaller than 0.2 mm

49 of diameter (Tokay et al., 2001). Impact based and pressure disdrometers,  
50 however, rely on theoretical terminal velocity curves to determine the PSD.

51 More recent disdrometers are based in optical principles (Hauser et al.,  
52 1984; Löffler-Mang and Joss, 2000), either from the occlusion of a laser light  
53 beam between an emisor and a receptor device produced by the particle  
54 passing through; or based on light scattering measurements from particles  
55 passing through the light beam. Both types use an emissary and a receiver  
56 of the laser signal generally in a horizontal plane, and the emissary can  
57 be punctual or an array of emissaries. Commercial examples of the first  
58 type are the particle size and velocity disdrometers Parsivel and Parsivel<sup>2</sup>  
59 by OTT Hydromet, and the Laser Precipitation Monitor (LPM) by Thies  
60 Clima. An example of the light scattering principle is the light scatter sensor  
61 PWS100 (Campbell Scientific Inc.). Optical disdrometers provide full PSVD  
62 measures from the unique light beam horizontal plane ( $\sim 1$  cm thick) by the  
63 amplitude and duration obscuration when particles pass through the beam,  
64 respectively. Laser disdrometers are not devoid of detection problems related  
65 with the effects of uneven power distribution across the laser beam, wind,  
66 splashing, multiple drops appearing at the same time (double detections),  
67 edge events ('margin-fallers', or partial detections), as reviewed by several  
68 studies (Nespor et al., 2000; Habib and Krajewski, 2001; Tokay et al., 2001;  
69 Kruger and Krajewski, 2002; Frasson et al., 2011; Raupach and Berne, 2015).

70 An improvement over laser disdrometers is the two-dimensional video  
71 disdrometer (2DVD, Joanneum Research). The 2DVD uses two perpendic-  
72 ular high-speed line-scan cameras, each with an opposing light source, to  
73 record particles from orthogonal angles. The 2DVD provides reliable mea-  
74 sures of particles fall velocity, size and shape (Kruger and Krajewski, 2002;  
75 Schönhuber et al., 2008). Currently this disdrometer is considered a reliable  
76 reference for particles larger than 0.3 mm (Tokay et al., 2013; Thurai et al.,  
77 2017), although its use is mostly restricted to experimentation due to its  
78 higher cost and data processing requirements.

79 A bibliography search by the key phrase ‘optical AND disdrometer’ on  
80 publications between 2000 and 2017 in Scopus showed that the two models  
81 most currently used are OTT Parsivel (mentioned in 50% of a total of 200  
82 documents) and Thies LPM (mentioned in 25%). In some disciplines, both  
83 disdrometers have been used interchangeably. This is the case, for instance, of  
84 soil erosion studies, where Thies LPM was used for monitoring rainfall char-  
85 acteristics, most notably the kinetic energy, in relation with splash erosion  
86 experiments (Angulo-Martínez et al., 2012; Fernández-Raga et al., 2010), and  
87 also in the calibration of the European portable rainfall simulator (Iserloh et  
88 al., 2013). Parsivel disdrometers, on the other hand, have been used to deter-  
89 mine the kinetic energy - rainfall intensity relationship (Petan et al., 2010 ;  
90 Sánchez-Moreno et al., 2012). Both disdrometers were used interchangeably  
91 in Slovenia to estimate rainfall parameters, including kinetic energy (Petan  
92 et al., 2010; Ciaccioni et al., 2016), and to inter-compare solid precipitation  
93 observations in the Tibetan Plateau (Zhang et al., 2015).

94 The performance of Parsivel and Thies disdrometers has been compared  
95 to other disdrometers such as the 2DVD, the JWD, or by taking a pluviome-  
96 ter as a reference. Parsivel disdrometers have been evaluated since its first  
97 version became commercially available from PM Tech Inc (Sheppard and  
98 Joe, 1994; Löffler-Mang and Joss, 2000), with slightly different results de-  
99 pending on the version of the device analysed (Krajewski et al., 2006; Lanza  
100 and Vuerich, 2009; Battaglia et al., 2010; Jaffrain and Berne, 2011; Thurai  
101 et al., 2011; Park et al., 2017). In 2005, OTT Hydromet purchased the rights  
102 of Parsivel disdrometer and redesigned the instrument. Differences between  
103 the PM Tech and the first version of OTT Hydromet Parsivel are described  
104 in Tokay et al. (2013), who found important biases in the frequency of small  
105 and large drops with respect to a JWD disdrometer. In 2011, OTT Hydromet  
106 redesigned the device and presented the Parsivel<sup>2</sup>. This is the current ver-  
107 sion of the disdrometer, and includes a more homogeneous laser beam and  
108 some other modifications that improve its performance (Tokay et al., 2014;  
109 Angulo-Martínez and Barros, 2015). The Parsivel<sup>2</sup> has been compared to

110 other disdrometers. Tokay et al. (2014) compared it with the JWD, and  
111 found good agreement in the PSD spectra between both devices for particles  
112 sizes larger than 0.5 mm. They also reported systematic underestimation of  
113 fall velocities in the Parsivel<sup>2</sup>, for drop diameters of 1.09 mm and higher.  
114 Raupach and Berne (2015) and Park et al. (2017) compared the two ver-  
115 sions of Parsivel with a reference 2DVD, and found that Parsivel<sup>2</sup>, although  
116 improving the performance of the first iteration of the disdrometer, still had  
117 important biases that resulted in underestimation of small drops and overes-  
118 timation of large drops, especially during high intensity rains.

119 Thies LPM, on the other hand, became commercially available in 2005  
120 from Adolf Thies GmbH & Co. Early analysis of the performance of the Thies  
121 disdrometer for detecting different hydrometeors was presented by Bloemink  
122 and Lanzinger (2005) at the WMO Technical Conference on Meteorological  
123 and Environmental instruments and methods of observations (TECO-2006,  
124 Geneva, Switzerland), while an evaluation of its capacity for measuring rain-  
125 fall intensities and amounts was presented in the same conference one year  
126 later (Lanzinger et al., 2006). Since then, this disdrometer has been used  
127 worldwide with several firmware updates. Frasson et al. (2011) evaluated  
128 the performance of four collocated Thies disdrometers and found that sys-  
129 tematic biases existed between the devices, and attributed them to miscalcu-  
130 lation of the disdrometer’s sensing area. Lanzinger et al. (2006) found that  
131 three LPMs measured higher rainfall amounts than a collocated reference  
132 rain gauge, especially during higher intensities, and also reported system-  
133 atic biases between the three disdrometers. Upton and Brawn (2008) also  
134 found discrepancies in the velocity records by three collocated Thies, while  
135 the number of particles and their sizes were more consistent.

136 There number of studies inter-comparing Thies and Parsivel disdrometers,  
137 however, is very reduced. Brawn and Upton (2008) evaluated the paramet-  
138 ers of fitted gamma distributions to the PSD data, and found substantial  
139 differences between Thies and Parsivel. Upton and Brawn (2008) found that

140 Parsivel tended to underestimate the number of small drops (up to three  
141 times less for the two lowest size bins) with respect to Thies, while it tended  
142 to over-estimate the number of drops larger than 2 mm. They also reported  
143 an underestimation of particle fall velocity in comparison with Thies and  
144 with the theoretical terminal velocity, especially for midsize drops (1 mm -  
145 3 mm), and underestimation of total rainfall volume by Parsivel with respect  
146 to Thies. These studies were based on the earlier version of the Parsivel dis-  
147 drometer, and no study up to date has focused on comparing the Thies LPM  
148 and the Parsivel<sup>2</sup>. Such a study, however, is highly needed if measurements  
149 made with these two disdrometers are to be compared.

150 The objective of this study is to compare the measurements recorded by  
151 Thies LPM and OTT Parsivel<sup>2</sup> optical disdrometers, with the goal of provid-  
152 ing a quantitative assessment of both sensors and highlighting the associated  
153 uncertainties. Measurements of PSVD and integrated rainfall variables as  
154 rain rate, kinetic energy, reflectivity and number of drops per volume of air  
155 under natural rainfall events are compared, either at the one-minute, the  
156 event and the whole season scales. Some technical problems that arise from  
157 the different binning of the PSVD matrix by the two devices, which hinder  
158 the comparison between their measurements, are dealt with. In the following  
159 section a description of the two sensor types and the sampling site is given,  
160 together with details of the data processing. Section 3 analyses the results  
161 obtained, which are discussed in section 4. Section 5 concludes.

## 162 **2. Data and Methods**

### 163 *2.1. Sampling site and instrumentation*

164 Rainfall characteristics under natural conditions were monitored at Aula  
165 Dei Experimental Station (EEAD-CSIC) in the central Ebro valley, NE Spain  
166 ( $41^{\circ}43'30''$ N,  $0^{\circ}48'39''$ W, 230 m.a.s.l.). The experimental site is located in a



167 research farm located on a flat river terrace, classified as having a cold semi-  
168 arid climate (BSk, Köppen-Geiger). The average annual precipitation was  
169 344.4 mm in the period 1990-2017 (recorded at the Aula Dei meteorological  
170 station which belongs to the network of the Spanish national weather agency,  
171 AEMET) with equinoctial rainfalls (monthly maxima in May, 44 mm, and  
172 October, 39.3 mm; and minima in July, 16.2 mm, and December, 21.7 mm).

173 Four disdrometers, two Thies Clima LPM and two OTT Parsivel<sup>2</sup>, were  
174 operated in continuous record during the period between 17/06/2013 and  
175 21/07/2015. Two disdrometers of both types were placed in two masts (Mast-  
176 1 and Mast-2), which were located 1.5 m apart from each other (Figure 1).  
177 Each mast consisted in a pole with two arms 0.5 m apart from each other  
178 where two devices, one of each model, were installed. The four sensors were  
179 oriented in the same N-S direction. One-minute rainfall PSVD observations  
180 were recorded automatically during the period, and rainfall episodes were  
181 identified according to the following criteria: a rainfall episode started when  
182 rainfall was continuously recorded by at least two disdrometers of different  
183 type during at least 10 minutes; and two rainfall episodes were delimited  
184 by, at least, one entire hour without rain in at least two disdrometers of  
185 different type. Observations corresponding to solid or mixed precipitation  
186 were disregarded, as were those with internal error or bad quality flags.

187 [FIGURE 1: Sampling site with four collocated disdrometers ]

188 Both optical disdrometers, Thies Clima LPM and OTT Parsivel<sup>2</sup>, are  
189 based on the same measurement principle. Their external structure is formed  
190 by two heads that connect the sheet of laser light through which falling  
191 drops are measured. Drop diameter and fall velocity are determined from the  
192 obscurations amplitude and duration in the path of an infrared laser beam,  
193 between a light emitting diode and a receiver, within a sampling area of  
194 approximately 50 cm<sup>2</sup> (Donnadieu et al. 1969; Löffler-Mang and Joss, 2000).

195 Raindrops are assumed spherical for sizes less than 1 mm in diameter, and  
196 therefore the size parameter is the equivalent diameter for raindrops below  
197 this size. For larger raindrops, a correction for oblateness is made, and  
198 the size parameter is interpreted as an equi-volume sphere diameter. The  
199 laser signal is processed by a proprietary software, and the size (equi-volume  
200 particle diameter) and velocity of each particle is determined. The meteor  
201 type (drizzle, rain, hail, or snow) is determined based on typical size and  
202 velocities, and weather codes (SYNOP and METAR) are generated. A PSVD  
203 matrix counting the number  $N_{i,j}$  of particles for given size ( $i$ ) and velocity ( $j$ )  
204 classes is recorded at desired intervals, usually one minute. Several integrated  
205 variables are also computed and stored at the same intervals. These include  
206 the number of particles detected ( $NP$ ,  $\text{min}^{-1}$ ), the particle density ( $ND$ ,  
207  $\text{m}^{-3} \text{mm}^{-1}$ ), the rainfall amount ( $P$ , mm) and intensity ( $R$ ,  $\text{mm h}^{-1}$ ), the  
208 radar reflectivity ( $Z$ ,  $\text{dB mm}^6 \text{m}^{-3}$ ), visibility (m) and kinetic energy ( $\text{J m}^{-2}$   
209  $\text{mm}^{-1}$ ).

210 This operational principle is subject to a number of potential sources of  
211 bias, as reviewed by Frasson et al. (2011). One of such sources of bias is the  
212 uneven power distribution across the laser beam, or variations of this power  
213 with time. Also, the geometry of the laser beam limits the estimation of  
214 fall velocity to the vertical component, producing biased measures when the  
215 particles fall with a different trajectory or angle due to wind or eddy drag  
216 (Salles and Poesen, 1999). Other source of biased measurements is due to the  
217 occurrence of coincident particles, which are perceived as just one single drop  
218 by the sensor. Similarly, the event of one drop falling at the edge of the laser  
219 beam ('margin faller'), therefore being only partially observed, leads to biased  
220 measurements. Both sensors mention in their technical data some correction  
221 for edge-detection (margin fallers) and coincident particles, although there is  
222 little information on how these two events are identified and treated. More  
223 details of both instruments and the measurement technique, along with the  
224 assumptions used to determine the size and velocity of hydrometeors, can  
225 be found in Löffler-Mang and Joss (2000), Battaglia et al. (2010), Tapiador

226 et al. (2010), Frasson, et al. (2011) Jaffrain and Berne (2011), Tokay et al.  
227 (2013 and 2014), Raupach and Berne (2015), and in their respective technical  
228 manuals.

229 There are slight hardware variations between the two instruments, as  
230 well as differences in how the raw data are treated and converted into the  
231 outputted variables. Since these differences may have an impact on the final  
232 records, we review the relevant characteristics of each device in the following  
233 paragraphs.

#### 234 *Thies Clima Laser Precipitation Monitor*

235 The Laser Precipitation Monitor (LPM) uses a 780 nm laser beam which  
236 is 228 mm long, 20 mm wide, and 0.75 mm thick on average, resulting in  
237 a sampling area of 45.6 cm<sup>2</sup>. Geometric deviations from this standard are  
238 reported by the manufacturer for each particular disdrometer, and for in-  
239 stance the sampling areas of the two devices used on the experiment were  
240 46.65314 and 49.04051 cm<sup>2</sup>. It records particles starting from 0.16 mm of  
241 diameter, and precipitation starting from 0.005 mm h<sup>-1</sup>. The Thies tech-  
242 nical documentation indicates that the size and velocity measurements  
243 are ‘checked for plausibility’ to prevent issues such as edge events, implying  
244 that some particles are filtered out, although the details of this procedure  
245 are not specified. From the raw particle data several bulk variables (‘PSVD  
246 moments’) are integrated internally by the device’s firmware. Drop diame-  
247 ters and velocities are then grouped into 22 and 20 classes ranging between  
248 0.125 mm up to 9 mm and 0 m s<sup>-1</sup> up to 12 m s<sup>-1</sup>, respectively (see Table  
249 6), and the number of particles recorded at each size and velocity pair bin  
250 is stored. The bulk variables computed by the Thies LPM does not include  
251 the kinetic energy. In addition, several status flags are provided in the data  
252 telegrams informing about voltage oscillations, sensor temperature, and an  
253 evaluation of the measurement quality.

255 *OTT Parsivel<sup>2</sup> disdrometer*

256 The Parsivel disdrometers used in this study belong to the second gener-  
257 ation manufactured by OTT Hydromet Inc (Parsivel<sup>2</sup>). The Parsivel<sup>2</sup> uses a  
258 780 nm laser beam which is 180 mm long, 30 mm wide, and 1 mm thick on  
259 average, with no indication about deviations from these values from the man-  
260 ufacturer. The sampling area for the two Parsivel disdrometers was therefore  
261 54 cm<sup>2</sup>. The Parsivel<sup>2</sup> records particles starting from 0.2 mm of diameter,  
262 and precipitation starting from 0.001 mm h<sup>-1</sup>. The measured particles are  
263 stored in drop diameter and fall velocity bins in a 32 x 32 matrix with uneven  
264 intervals starting at 0 mm diameter up to 26 mm and from 0 m s<sup>-1</sup> up to  
265 22.4 m s<sup>-1</sup> (Table 6). The first two size categories, which correspond to sizes  
266 of less than 0.25 mm, are left empty by the manufacturer because of the low  
267 signal-to-noise ratio. The Parsivel<sup>2</sup>, similarly to the Thies, also provides a  
268 sensor status flag and several control variables in its data telegram.

269 According to Battaglia et al. (2010), particles up to 1 mm are assumed  
270 spherical, and between 1 and 5 mm they are assumed as horizontally-oriented  
271 oblate spheroids with axial ratio linearly varying from 1 to 0.7, with this ratio  
272 being kept constant at 0.7 for larger sizes. The Parsivel technical documen-  
273 tation mentions that the device filters out edge events, although the exact  
274 details of this procedure are not given. Battaglia et al. (2010) mention that  
275 the newest Parsivel units include two extra photo-diodes at the edge of the  
276 laser beam to detect and remove the edge events, but the manufacturer pro-  
277 vides no information about this. Independently to filtering our edge events,  
278 Löffler-Mang and Joss (2000) indicate that a correction of the effective sam-  
279 pling area is used depending on the particle size. Some sources (Tokay et  
280 al., 2013) also refer that a correction to the fall velocity is applied to drop  
281 sizes between 1 and 5 mm, although once again there is not more information  
282 on this correction. Parsivel<sup>2</sup> disdrometers external structure differs from the

283 Thies LPM in incorporating a splash protection shield above the laser heads,  
 284 which aims at minimising the effect of splashed drops that interfere with a  
 285 high velocity with the laser beam and result in biased measurements.

## 286 2.2. Processing disdrometer data

287 One minute disdrometer data telegrams were stored in an industrial  
 288 miniature PC (Matrix 504 Artila Inc). The PC included custom software  
 289 to collect, pre-process and send data telegrams to a central server. Time  
 290 synchronisation was performed once per day using the Network Time Proto-  
 291 col (NTP), allowing bias correction of the internal disdrometer clocks that  
 292 have a tendency to drift. Direct reading of the data telegrams generated  
 293 by the disdrometers resulted in one-minute time series of the variables of  
 294 interest for this study: PSVD matrices ( $N_{i,j}$ ), bulk variables ( $P$ ,  $R$ ,  $NP$ ,  $ND$ ,  
 295  $Z$ ,  $E$ ), SYNOP codes, and status and error flags. An exception were Thies  
 296 disdrometers, which do not compute the kinetic energy,  $E$ . Parsivel, on the  
 297 other hand, gives the kinetic energy expressed in J, so it was divided by the  
 298 sampling area and the rainfall amount to obtain  $E$ .

299 In addition to the bulk variables computed by the internal software of the  
 300 devices, the bulk variables were computed again from the PSVD matrices,  
 301 using the following expressions:

$$P = \frac{4}{3} \pi \sum_{i,j} \left( \frac{1}{A_i} N_{i,j} \left( \frac{D_i}{2} \right)^3 \right) \quad (1)$$

$$R = \frac{P}{\Delta t} \quad (2)$$

$$NP = \sum_{i,j} N_{i,j} \quad (3)$$

$$ND = \frac{1}{R \Delta t} \sum_{i,j} \left( \frac{1}{A_i} \frac{N_{i,j}}{V_j} \right) \quad (4)$$

$$Z = \log \left( \frac{1}{\Delta t} \sum_{i,j} \left( \frac{1}{A_i} N_{i,j} \frac{D_i^6}{V_j} \right) \right) \quad (5)$$

$$E = \frac{4}{3} \pi \frac{\rho}{P} \sum_{i,j} \left( \frac{1}{A_i} N_{i,j} \left( \frac{D_i}{2} \right)^3 \frac{V_j^2}{2} \right) \quad (6)$$

302 where  $\rho$  is the density of water (1000 kg m<sup>-3</sup>),  $D_i$  is the mean diameter of  
 303 class  $i$ ,  $V_j$  is the mean velocity of velocity class  $j$ , and  $\Delta t$  is the sampling  
 304 frequency (s). The effective sampling area,  $A_i$  (m<sup>-2</sup>) depends on the particle  
 305 size, since in order to be correctly sensed the particles need to be inside the  
 306 light beam in its entirety, so:

$$A_i = A \left( 1 - \frac{D_i}{2w} \right) \quad (7)$$

307 where  $A$  is the sampling area of the disdrometer and  $w$  is the width of the  
 308 laser beam. As it can be seen, the effective sampling area gets reduced as the  
 309 drop size increases, and the magnitude of the correction applied is inversely  
 310 proportional to  $w$ .

311 This allowed, on one hand, obtaining  $E$  for Thies disdrometers, but also  
 312 permitted to apply a number of corrections that simplified the comparison  
 313 between the two types of disdrometer. Thus, we ignored the particle counts  
 314 in the first size bin of Thies disdrometers and the counts in the size bins  
 315 larger than 8 mm, so the two disdrometer types were measuring the same  
 316 range of drop sizes (0.25 to 8 mm). We also applied a filter to remove highly  
 317 unlikely drop size and velocity combinations, as done in many studies (e.g.,  
 318 Tokay et al., 2001; Jaffrain and Berne, 2011; Tokay et al., 2013; Raupach et

319 al., 2015). In order to do that, each size and velocity bin was compared with  
320 the terminal fall velocity model of Beard (1976), and the bins for which a  
321 difference larger than 50% existed with the theoretical model were excluded.

322 In order to compare PSVD data between disdrometer types, the 10th,  
323 50th and 90th percentiles of the particle size ( $D10$ ,  $D50$ ,  $D90$ ) and velocity  
324 ( $V10$ ,  $V50$ ,  $V90$ ) were computed (Table 2). One problem that arises when  
325 percentiles are computed from binned data is that the resulting percentiles  
326 may be biased depending on the binning structure of the data. If all the  
327 particles recorded in one bin are assigned the mean value of the bin (the  
328 easiest option), different bin configurations will lead to different computed  
329 percentiles, even if the raw data before binning were the identical. When  
330 data from different binning structures are compared, as it is the case here  
331 between Thies and Parsivel disdrometers, an interpolation scheme needs to  
332 be used for distributing the range of values within each bin across all the  
333 particles corresponding to that bin. Here we used a random distribution  
334 over the range of values in the bin following a linear probability distribution  
335 constructed by fitting a line between two points determined as the average  
336 of the number of particles in the bin and the corresponding values on the  
337 neighbouring bins. Given the high number of particles detected, the random  
338 component of this scheme has a negligible effect on the results. Once all  
339 the number of particles by minute were assigned particle size and velocity  
340 values, the percentiles were calculated, allowing for a comparison between  
341 disdrometers.

342 In addition to one-minute data, the mean (m) and maximum (M) values  
343 of some of these variables ( $Rm$ ,  $RM$ ,  $KEm$ ,  $KEM$ ,  $Em$ ,  $EM$ ,  $NPm$ ) were  
344 computed for each rainfall event. A summary of the variables analysed is  
345 provided on Table 2.

346

[TABLE 2]

347 All data processing, including reading the raw telegrams, computing the  
348 integrated variables (erosivity for Thies LPM and size and velocity per-  
349 centiles), and plotting, was performed using a custom package for the R  
350 environment, `disdRo` (Beguería et al., 2017).

### 351 *2.3. Comparison of disdrometer measurements*

352 Prior to any analysis, minute observations with low-quality or bad sensor  
353 status flags were removed from the comparison dataset. Minutes with miss-  
354 ing data, precipitation below  $0.1 \text{ mm h}^{-1}$  or less than 10 particles detected  
355 in any of the four disdrometers were also removed. This way, only minutes  
356 with good quality data in the four devices were considered in the analysis.  
357 The comparison was made primarily on the bulk variables computed from  
358 the PSVD matrix stored in the one-minute telegrams outputted by the four  
359 disdrometers, by applying equations 1 to 6. We also compared the bulk vari-  
360 ables calculated by the internal firmware of the devices, in order to check the  
361 impact of the effective sampling area correction and the removal of unlikely  
362 size-velocity bins.

363 Kernel density and violin plots, i.e. non-parametric graphical estima-  
364 tions of the probability density functions of the variables, were used as a  
365 preliminary analysis tool. A formal comparison between the two disdrom-  
366 eter types was performed using a Gamma generalised linear mixed model  
367 (Gamma GLMM), with the bulk variables listed in Table 2 as response  
368 variables. Mixed models allow incorporating both fixed-effects and random-  
369 effects in the regression analysis (Pinheiro and Bates, 2000). The fixed-effects  
370 describe the values of the response variable in terms of explanatory variables  
371 that are considered to be non-random, whereas random-effects are treated  
372 as arising from random causes, such as those associated with individual ex-  
373 perimental units sampled from the population. Hence, mixed models are  
374 particularly suited to experimental settings where measurements are made  
375 on groups of related, and possibly nested, experimental units. If the group-



376 ing factor was ignored when modelling grouped data, the random (group)  
 377 effects would be incorporated to the error term, leading to an inflated esti-  
 378 mate of within-group variability. This allowed us to assess for differences in  
 379 the response variables as a function of the disdrometer type (fixed factor),  
 380 while controlling for possible differences due to the location of the two masts  
 381 (random factor). Since the explanatory variable is a dichotomic variable  
 382 (the disdrometer type), this configuration is equivalent to a random-effects  
 383 Analysis of Variance (ANOVA). A Gamma distribution was used to model  
 384 the response variables, since this distribution is best suited to positive data  
 385 with variance increasing with the mean, as it is the case of the disdrometric  
 386 variables analysed here. This model configuration can be described as:

$$\begin{aligned}
 y_i &\sim \text{Gamma}(\theta_i, \nu) \\
 \theta_i &= \nu / \mu_i \\
 g(\mu_i) &= \mu + \beta_{t(i)} + \alpha_{m(i)} + \epsilon \\
 \beta_{t(j)} &\sim \mathcal{N}(0, \sigma_\beta^2) \\
 \alpha_{m(i)} &\sim \mathcal{N}(0, \sigma_{m(i)}^2) \\
 \epsilon &\sim \mathcal{N}(0, \sigma^2)
 \end{aligned} \tag{8}$$

387 where  $y_i$  is the  $i$ th observation of the response variable  $Y$ ;  $\nu$  is a shape  
 388 parameter;  $\theta_i$  is a scale parameter, which can be expressed in terms of  $\nu$   
 389 and a mean value corresponding to the  $i$ th observation  $\mu_i$ ;  $\mu$  is a global  
 390 mean;  $\beta_{t(i)}$  is a parameter accounting for the effect of the disdrometer type  
 391 corresponding to observation  $i$ ,  $t(i)$ ; and  $\alpha_{m(i)}$  is a parameter accounting for  
 392 the location (mast) corresponding to observation  $i$ ,  $m(i)$ . In our case, we  
 393 counted with four disdrometers grouped into  $t(i) = (T, P)$  disdrometer types  
 394 (Thies and Parsivel, respectively), and located in  $m(j) = (1, 2)$  masts, and  
 395 we set  $\beta_1 = \alpha_1 = 0$ . For the link function  $g(\mu_i)$  we used an identity link,  
 396  $g(\mu_i) = \mu_i$ , except for  $R$ ,  $Z$ ,  $E$  and  $NP$  for which a log link,  $g(\mu_i) = \log \mu_i$ ,  
 397 was used.

398 The model in eq. (8) was fitted by generalized least squares (GLS), using  
399 the function `lme` from the R library `lme4` (Pinheiro and Bates, 2011). A  
400 random sample of  $N=1000$  records, corresponding to 250 minutes, was used  
401 in the analysis, in order to avoid size effects affecting negatively the statistical  
402 significance tests (Type I error inflation; see, e.g., Lin et al., 2013).

### 403 3. Results

404 A summary report on the data acquired by the four disdrometers is re-  
405 ported on Table 3. Almost 100,000 minutes of data were obtained from  
406 each device. Missing values due to technical issues (power supply failures  
407 and device hangouts, data communication problems) were found in all dis-  
408 drometers, although they were more prevalent on one of the Parsivels (P2),  
409 resulting in a significantly lower number of records by this device. The num-  
410 ber of errors, as reported by the status flags of the devices, was low, albeit  
411 larger in Parsivel than in Thies devices. Some records were discarded due to  
412 quality issues, either based on the quality flag reported by Thies (only data  
413 with quality flags above 90% were accepted), or on non-consistent data in the  
414 telegram (saturation of the PSVD bins or excessively large intensity values)  
415 in the Parsivels. Since Parsivel does not report the data quality, no quality  
416 threshold could be used. Around 31% of the minutes recorded rain hydrome-  
417 ters in both Thies, while this percentage was lower for Parsivel (27.5% in  
418 P1; the value of P2 was even lower, but can not be considered since this  
419 device recorded a significantly reduced number of minutes due to technical  
420 issues). The larger amount of minutes with rainfall in Thies disdrometers  
421 can be attributed to their highest sensitivity, since they are able to records  
422 smaller raindrops (more on this later).

423 All types of precipitation events occurring in the sampling site were repre-  
424 sented, with the majority of observations corresponding with autumn rains,  
425 as corresponds to the climatology of the area. Rain rates varied between

426 0.014 mm h<sup>-1</sup> and 277 mm h<sup>-1</sup>. The minimum precipitation rates were be-  
427 tween 0.014 and 0.020 mm h<sup>-1</sup>, with no differences between devices. The  
428 absolute maximum precipitation rates measured during the experiment de-  
429 pended on the disdrometer type, with Thies being the ones recording the  
430 highest values.

431 As mentioned in section 2.1, only the common minutes were selected from  
432 the complete dataset, defined as those having high quality data and detection  
433 of rainfall particles in each of the four disdrometers. This led to a total of  
434 46,636 records, corresponding to 11,659 minutes belonging to 157 rainfall  
435 episodes.

436 [TABLE 3]

437 When considering only the records for which data of the four disdrometers  
438 existed, the total accumulated precipitation as measured by the disdrome-  
439 ters internal software was 244.9 mm (T1), 254.5 mm (T2), 220.4 mm (P1),  
440 and 228.1 mm (P2). This values were slightly different to those calculated  
441 from the PSVD data, which were slightly lower at 240.1 mm (T1), 253.0 mm  
442 (T2), 218.6 mm (P1), and 222.0 mm (P2). A graphical comparison of the  
443 cumulative time series for the computed and internal precipitation is pro-  
444 vided in Figure 2. Some discrepancies in total precipitation were therefore  
445 found between the devices, with the two Thies LPM devices recording more  
446 precipitation than the Parsivel ones. Between locations, mast 2 tended to  
447 record larger precipitation in both devices, although the magnitude of this  
448 difference was much lower than the difference between disdrometer types.

449 Differences were also found with respect to cumulative kinetic energy, for  
450 which larger values were also found for Thies (2100 and 2101 J m<sup>-2</sup> mm<sup>-1</sup>)  
451 than for Parsivel (1749 and 1829). This corresponds to values obtained from  
452 the PSVD data, since Thies disdrometers do not calculate the kinetic energy  
453 internally. Unlike with  $P$ , for  $E$  there were important differences between

454 the values measured by the Parsivel<sup>2</sup> disdrometers (2100 and 2181) and those  
455 calculated from the PSVD, reported above.

456 This result suggests that differences between devices could be done, to  
457 a certain extent at least, to Thies LPM devices being more sensitive in the  
458 lower range of the PSVD spectrum, although this hypothesis requires further  
459 analysis, as done in the following sections.

### 460 *3.1. Example events*

461 Two events, representative of low and high precipitation intensity rates,  
462 were selected to illustrate the differences between disdrometer outputs. Time  
463 series of some bulk variables are shown in Figures 3 and 4. In both events,  
464 Thies devices consistently reported higher rainfall intensity and cumulative  
465 precipitation. This is related to a larger number of rain particles detected, as  
466 shown by the number density (which factors out the different rain intensities).  
467 There were differences, too, in the median particle size, which was much  
468 larger in the Parsivel devices. Interestingly, it seems that these differences  
469 (larger number of drops in Thies, but larger mean size in Parsivel) somehow  
470 cancelled out for radar reflectivity and kinetic energy, which depend both on  
471 the number of drops, their size and velocity.

472 These differences were most evident in the high intensity event, and were  
473 also higher if no corrections for unlikely drops and effective sampling area  
474 were performed (Supplementary material, Figures A.1 and A.2).

475 [FIGURES 3 and 4]

476 The PSVD plots (Figures 5 and 6), depicting the number of drops de-  
477 tected for each combination of drop size and velocity classes during the event  
478 by each disdrometer, help explain the differences found. A first and evident

479 difference is that Thies disdrometers had a much wider distribution of the  
480 PSVD spectra than Parsivel ones. The terminal velocity of raindrops as a  
481 function of their size according to Beard (1978), also depicted in the figure,  
482 was used to filter out unlikely combinations of size and velocity. Combina-  
483 tions which differ by more than 50% with the theoretical fall velocity are  
484 represented in the figure with a 50% transparency. Although a majority of  
485 particles were found to lie in a region close to the theoretical line, Thies de-  
486 vices had a much larger number of particles far from the theoretical model,  
487 both in the high and low intensity events. Particularly, a large number of very  
488 small particles at much higher velocities than expected was very prominent,  
489 as were the drops with a large diameter but a fairly low velocity. Typically,  
490 the first case (small, fast raindrops) are attributed to edge events (partial  
491 recognition or larger drops falling in the edge of the laser beam), or splashed  
492 particles, while the second case are interpreted as double detections (two or  
493 more simultaneous drops). Both effects tend to increase with the precipita-  
494 tion intensity, as the anomalous events become more frequent.

495 The frequency of anomalous raindrops was much lower in the Parsivel  
496 output, for which the vast majority of cases fell within the theoretical model  
497 limits. This can be attributed to a number of facts. From pure geometrical  
498 considerations, a larger prevalence of edge events can be expected from Thies,  
499 since its laser beam has a reduced width (20 mm) with respect to Parsivel  
500 (30 mm), so the proportion of edge events with respect to the number of  
501 particles detected is higher. Other reasons such as a larger proneness to  
502 splashing or differences in the internal processing of the data (that, as stated  
503 by the manufacturers, includes some filtering of anomalous data), may also  
504 help explain this differences.

505 Finally, and interestingly, an underestimation of drop velocities with re-  
506 spect to the theoretical model could be found in Parsivel devices, most no-  
507 tably in the high intensity event and for particles larger than 1 mm.

508 A formal analysis of these differences, considering the whole data set, is  
509 presented in the following section.

510 [FIGURE 5 and 6]

### 511 3.2. Integrated variables, minute scale

512 When the whole dataset was analysed, differences between disdrometers  
513 were also evident, as shown by the exploratory kernel density plots (Figure  
514 7). This was further confirmed by the Gamma GLMM analysis (Table 4).  
515 The coefficients reported in the Table for the fixed effects correspond to  $\beta_T$   
516 and  $\beta_P$  when  $\mu$  is set to zero in equation 8, and can be interpreted as the  
517 mean values of the response variables for each disdrometer type, when other  
518 factors (the mast, in this case) are accounted for. The table includes also the  
519 p-values corresponding to these coefficients, as well as the residual and mast  
520 standard deviation ( $\sigma$  and  $\sigma_{m(i)}$ , respectively).

521 [FIGURE 7 and TABLE 4]

522 The analysis yielded significant differences between disdrometer types for  
523 all the response variables analysed, while the random effect (the mast) had  
524 a negligible effect as shown by its small variance with respect to the random  
525 error (residual). There were substantial differences in the number of particles  
526 detected,  $NP$ , and in the PSVD percentiles. Thus, Thies disdrometers had  
527 a lower coefficient for  $NP$  (230 vs 194), indicating a tendency to detect a  
528 higher number of particles (an increase of circa 20%). Thies also had much  
529 lower coefficients for  $D10$  and  $D50$  (0.59 vs 0.74 for the median drop size,  
530 i.e. a decrease of circa 20%), as well as for  $V10$  and  $V50$  (2.4 vs 2.9, i.e. an  
531 18% difference). The magnitude of the difference was lower for the highest  
532 percentiles ( $D90$  and  $V90$ ), where Thies even had a higher coefficient for  
533 velocity, indicating a larger spread of velocities compared to Parsivel.

534 These differences in the number of particles and in the PSVD were trans-  
535 lated to the bulk variables, which also showed significant differences in all  
536 cases. The magnitude of the effect, i.e. the mean differences between the two  
537 disdrometer types, were high for the particle density (21,600 vs 15,920, a 36%  
538 increment) and kinetic energy (11.09 vs 9.66, i.e. a 15% difference), while  
539 they were smaller (albeit significant) for  $R$  and  $Z$  (12% and 7% difference,  
540 respectively).

541 The differences found in the PSVD percentiles allows for a better un-  
542 derstanding of the differences in the integrated variables, since the particle  
543 size and velocity have contrasting effects on  $R$ ,  $ND$ ,  $Z$ , and  $E$ . In general,  
544 a higher number of particles implies increasing values of all these variables,  
545 which favours Thies devices since it tended to detect a higher number of par-  
546 ticles. The particle size, on the other hand, has a similar effect of increasing  
547 all the variables for which it is relevant ( $R$ ,  $Z$  and  $E$ ). Since the particle  
548 size was in general higher in Parsivel devices, this effect partially cancels out  
549 the effect of the increasing number of particles. Particle velocity, which was  
550 in general higher in Parsivel (except for the largest drops), has a positive  
551 effect in  $E$ , but a negative effect on  $Z$ , which further explains the differences  
552 found. The particle density ( $ND$ ), finally, is not affected by the drop size and  
553 is negatively affected by fall velocity, and that the reason why this variable  
554 showed the highest difference between both disdrometers.

### 555 3.3. Integrated variables, event scale

556 Although one of the benefits of the optical disdrometers is their ability  
557 to provide large amounts of information at very fine temporal scales (as one-  
558 minute data analysed here), very frequently these data data are aggregated  
559 over larger time periods or rainfall events for practical issues. For instance,  
560 it is typical the computation of kinetic energy totals for rainfall events, for  
561 instance for soil erosion applications. When considering the same variables  
562 at the event level, looking at the mean and maximum values over the event,

563 similar results were found (Figure 8 and Table 5).

564 [FIGURE 8 and TABLE 5]

565 Again, significant fixed effects were found for all response variables, while  
566 the random effect was marginal in all cases. The average number of particles  
567 during the events was much larger for Thies, and the median drop size and  
568 velocity was lower. There were also differences, although of smaller size, in  
569 the rest of integrated variables.

#### 570 3.4. *Effect of PSVD data correction*

571 The effect that the data correction scheme may have on the integrated  
572 variables merits some analysis, since it modifies the PSVD distribution. Here  
573 we applied a filter that consisted on eliminated the unlikely drops, which was  
574 aimed at eliminating edge events and double detections, while a correction  
575 for the sensing area as a function of the drop size was applied to compensate  
576 the loss of mass. The results showed in the previous sections were all based  
577 on the corrected data, but in order to determine the effect of this correction  
578 on the computed variables, the analysis was replicated without applying the  
579 filtering and the correction.

580 The results are shown in the Supplementary material, in Table A.1 and  
581 Figure 7. A comparison with the results shown in the previous section re-  
582 veals the same general pattern, but with stronger effects. For instance, the  
583 coefficient for the number of particles  $NP$  was 62% higher in Thies than in  
584 Parsivel. Interestingly, the effect of the correction on the particle size per-  
585 centiles had a different sign on Thies, for which  $D50$  increased from 0.53  
586 (without correction) to 0.60 (with correction), while on Parsivel it decreased  
587 from 0.80 to 0.74. For the median particle velocity ( $V50$ ), the coefficient re-  
588 mained very similar before and after correction for Thies, while for Parsivel



589 it increased from 2.88 to 3.09 (7%). The relative magnitude of the differences  
590 between Thies and Parsivel disdrometers was 88% for ND, 12% for R, 15%  
591 for E and 7% for Z, i.e. much higher than after filtering and correction for  
592 *ND* but similar for the other three variables.

### 593 3.5. Effect of rainfall intensity

594 Data were divided by intensity ranges in order to test if the effect of  
595 the disdrometer type changed with different rain intensities. As the rainfall  
596 intensity increases, it is expected to find more and bigger drops, which may  
597 in turn modify the differences found between disdrometer types. Data were  
598 thus divided in three intensity groups: low intensity (from 0.1 mm  $h^{-1}$  up to  
599 2 mm  $h^{-1}$ ), medium intensity (from 2 mm  $h^{-1}$  up to 10 mm  $h^{-1}$ ) and high  
600 intensity (more than 10 mm  $h^{-1}$ ). Model coefficients for the three intensity  
601 ranges are given in Table 6, and kernel density plots can be found in the  
602 Supplementary material (Figures A.4, A.5 and A.6).

603

[TABLE 6]

604 The same effects described above were found at different rainfall inten-  
605 sities. The magnitude of the effects, however, tended to increase with the  
606 intensity. Thus, the relative difference between the coefficients of *NP* ranged  
607 between 7% (146 vs 136) for low rainfall intensity, 27% for medium intensity  
608 and 65 % for high intensity, while the median particle size ranged between  
609 16%, 28% and 200%. Equally large were the relative differences between the  
610 coefficients of *ND*, which varied between 33%, 67% and up to 292%, while for  
611 the remaining variables the increase of the effect with the rainfall intensity  
612 was less pronounced.

#### 613 4. Discussion

614 Optical disdrometers are commercially affordable sensors able to provide  
615 a thorough description of precipitation, and they are being increasingly used  
616 by national weather services as present weather sensors and even rain gauges  
617 requiring low maintenance. Besides their use in operational networks, optical  
618 disdrometers provide information on precipitation drop spectra that has ap-  
619 plications in different fields, and they are being increasingly used in research.

620 Thies Clima LPM and OTT Parsivel<sup>2</sup> are among the most common, state-  
621 of-the-art, optical disdrometers. Despite being based on the same functioning  
622 principle and having similar characteristics in terms of sensibility and range  
623 of particle detection, there are substantial differences between them that  
624 may affect differently their records. We have stressed the differences in the  
625 higher and (more important) lower particle size detection ranges of the two  
626 devices, with Thies having a lower detection threshold that may induce bias  
627 in the records of the two disdrometer types. Filtering the PSVD matrix  
628 to a common detection range, as done here, allows for a fair comparison  
629 between the outputs of the disdrometers, and should be recommended for  
630 any study that aims at presenting general results. However, as we have seen  
631 here, despite applying the same detection thresholds to the data outputted  
632 by the two disdrometers, significant differences were found both at the level  
633 of PSVD spectra (particle size and velocity percentiles) and on the bulk  
634 variables (PSVD moments).

635 There are a number of factors that may help explain the differences found.  
636 Geometrical differences between the laser beams are highly relevant, since  
637 they greatly influence the probability of bias-inducing effects such as edge  
638 events ('margin fallers') and double detections. A larger sampling area, for  
639 instance, implies a higher chance of double detections. At this respect, the  
640 larger sampling area of Parsivel (54 cm<sup>2</sup>) over Thies devices (45.6 cm<sup>2</sup> on av-  
641 erage) implies that Parsivel disdrometer should be more affected by double

642 detections. Double detections, i.e. time-overlapping drops, may be sensed  
643 just as one single drop (hence causing a loss of mass which may translate  
644 to a reduced precipitation record); or as a much larger drop at an unusu-  
645 ally low velocity. Since these unusual particles are often discarded from the  
646 PSVD matrix, this may result in another source of mass loss, which may or  
647 not be partially solved by the sampling area correction (more on this later).  
648 Although this would require further research, for instance with the help of  
649 numerical simulations as in the work by Raasch and Umhauer (1984), we  
650 suspect that the tendency towards a lower number of particles detected and  
651 lower precipitation amounts found on Parsivel devices may have a relation-  
652 ship with this effect.

653 But geometrical effects are not restricted to this. Since the effective sam-  
654 pling area of optical disdrometers depends on the particle size, not only the  
655 total area but also the width of the laser beam plays an important role as a  
656 source of bias. In particular, the proportion of edge events (i.e. particles that  
657 are sensed only partially due to falling at the edge of the laser beam) over  
658 the total number of particle detections of the same diameter class is inversely  
659 proportional to the width of the beam. The smaller width of the laser beam  
660 on Thies (20 mm) over Parsivel (30 mm) plays against the former, which  
661 should be more prone to be affected by edge events. This becomes more  
662 relevant for the higher particle bins. For 5 mm particles, for instance, the ef-  
663 fective width gets reduced to 15 mm for Thies, i.e. a reduction of 25%, while  
664 for Parsivel this reduction amounts to 16.6%. Edge events result in partially  
665 sensed particles, implying a mass loss and an over-estimation of fall velocity.  
666 The high prevalence of over-accelerated, small particles in the PSVD spectra  
667 of Thies disdrometers may be related to this effect, although again further  
668 analysis is required in order to confirm this hypothesis. At this respect, the  
669 Thies manufacturer checks and reports on each device the deviations due to  
670 fabrication tolerances from the theoretical geometrical properties of the laser  
671 beam, whereas this information is not given for Parsivel.

672 In order to overcome this problems, we applied a correction scheme which  
673 is similar to the ones found in other studies (e.g. Löffler-Mang and Joss, 2000;  
674 Battaglia et al., 2010; Raupach and Berne, 2015). The scheme consists on  
675 two parts: the first implies removing highly unlikely particle counts, i.e. those  
676 with velocities that are far from the theoretical fall velocity corresponding to  
677 their size. These unlikely particles are most possibly caused by edge events  
678 and double detections, so they are removed from the PSVD data. This causes  
679 a loss of mass, and this loss of mass is uneven since it increases with the par-  
680 ticle size (due to the geometric effect explained above), so the second part of  
681 the scheme consists on correcting the effective sampling area used in calculat-  
682 ing the bulk variable from the PSVD (equation 7). The correction, however,  
683 is not guaranteed to restitute all the mass loss, and careful calibration is  
684 required in order to match the filtering of unlikely particles (which depends  
685 on the threshold used for particle removal) with the effective area correction.  
686 Here we used a threshold corresponding with a difference higher than 50%  
687 with respect to the theoretical fall velocity matched to a factor or 1/2 of the  
688 drop diameter for the area correction, but other combinations are possible.  
689 Again, numerical simulation should help in determining the best correction  
690 parameters, which in turn should consider the different beam geometries.

691 Our results showed differences between the two disdrometer types, which  
692 were not totally removed by the correction scheme (although they were par-  
693 tially diminished with respected to the un-corrected records). Differences in  
694 the in the internal treatment of the data by the two devices, which is not pub-  
695 lic, may also help explain this differences. Both manufacturers indicate that  
696 some treatment of unlikely detections is performed internally, but very little  
697 detail is given. From the examination of the raw PSVD matrices, it seems  
698 that the correction applied by Thies, if any, is very subtle, while the output  
699 of Parsivel seems to be much more affected by corrections. The technical lit-  
700 erature, also, gives more detail in the case of the Parsivel, for which at least  
701 a correction for the effective sampling area is reported (Löffler-Mang and  
702 Joss, 2000). The exact nature of these corrections, however, is not known, or

703 even if they are applied to the integrated variables only, or also to the PSVD  
704 data. This uncertainty makes it difficult to implement an effective correction  
705 scheme that makes the outputs of the two disdrometer comparable.

706 The external structure of the devices also plays an important role and  
707 may lead to incorrect drop detections due to turbulence (see, for instance,  
708 Constantinescu et al. 2007, for a review of turbulence induced errors on  
709 pluviometers) and splashing (particles intercepted by the enclosure of the  
710 devices which break and splash away in smaller but accelerated drops, see  
711 Kathiravelu et al., 2016). It seems that the Thies disdrometer is more prone  
712 to having splashed drops interfering with the laser beam, since it contains  
713 larger flat surfaces susceptible of splashing particles in the direction of the  
714 sensor. The Parsivel units, on the other hand, do not have flat surfaces  
715 and include a splash protection shield that seems to effectively reduce the  
716 risk of splashing. These morphological differences may also affect differently  
717 in case of wind, since the turbulences generated may be very different on  
718 both devices, and may also be a cause of systematic bias between the two  
719 disdrometers. A future study using high speed video and a wind-tunnel setup  
720 could help examine the occurrence and magnitude of these effects, which are  
721 poorly quantified up to now.

722 Finally, we also detected a tendency towards underestimating the velocity  
723 of falling particles in the case of the Parsivel units, especially in the range  
724 between 1 and 3 mm. This have been shown previously, and according to  
725 Tokay et al. (2014) this issue is known to the Parsivel manufacturer who  
726 mentioned that it is in process of being fixed. However, at least the units  
727 tested, still suffered from the same problem. Underestimation of the fall  
728 velocity may have a substantial influence on the bulk variables computed  
729 from the PSVD data, since the velocity intervenes in several of the equations.  
730 Systematic underestimation of fall velocity has an effect of increasing  $ND$   
731 and  $Z$ , while it decreases  $E$ .

732 Differences in the number of particles detected, and biases in the estima-  
733 tion of particle size and velocity, result in complex biases in the integrated  
734 variables. This is due to the different effect that these factors have on their  
735 computation, since depending on the case there are linear or inverse relation-  
736 ships involved. This stressed the relevance of not only an unbiased estimation  
737 of the PSVD by the disdrometers, but also of any filtering and correction  
738 scheme applied to the PSVD data during post-processing.

## 739 5. Conclusions

740 The two types of disdrometer analysed showed different PSVD spectra for  
741 the same rainfall events, while the differences between two devices of the same  
742 type were much smaller and compatible with random differences. In particu-  
743 lar, Thies devices recorded a much larger number of drops than Parsivel<sup>2</sup>, but  
744 also a much larger spread of the PSVD spectra, with a significant amount of  
745 drops with unexpected combinations of size and velocity, most notably small  
746 drops with excessively high velocities, compatible with edge events ('margin  
747 fallers'). Parsivel<sup>2</sup> devices, on the contrary, recorded less drops and a PSVD  
748 spectra which was much closer to the theoretical model. They also had a  
749 tendency towards underestimating drop velocity with respect to both Thies  
750 and a theoretical fall model.

751 Differences in the PSVD spectra resulted in significant discrepancies be-  
752 tween both disdrometers in all bulk precipitation parameters such as rain  
753 intensity and amount, particle density, radar reflectivity, or kinetic energy.  
754 These differences were found when these variables were computed by the in-  
755 ternal firmware of the devices, but also when they were computed by us from  
756 the PSVD data. When the PSVD data were filtered by considering only par-  
757 ticles with diameters between 0.25 and 8 mm and by removing unlikely drop  
758 size and velocity pairs, and a correction for the effective sampling area was  
759 used, the magnitude of the differences was reduced although the tendency

760 remained. In all cases, the differences increased with precipitation intensity,  
761 as did the variance between devices of the same type, in agreement with the  
762 expectation and with previous studies.

763 The differences found may be explained by hardware or software differ-  
764 ences. Geometrical differences on the laser beams of the two devices translate  
765 to different prevalence of bias-inducing effects such as edge events and double  
766 detections, while differences the external design may also have a large influ-  
767 ence on the drop splash. The manufacturers of both disdrometers indicate  
768 that corrections have been implemented to prevent or reduce the magnitude  
769 of this effects, but the exact procedures are not documented. Different so-  
770 lutions can be adopted to limit undesired effects, both at the hardware and  
771 the software level, and inspection of the resulting PVSD spectra during the  
772 same rainfall events suggests that the level of correction is higher in the case  
773 of Parsivel than in the case of Thies. Wether these differences are (total or  
774 partially) due to hardware and design differences, or they are caused by hard-  
775 ware or software filtering and correction of the PSVD data, is still a question  
776 with no clear answer. Since some crucial aspects of the internal functioning  
777 of both devices are hidden from the final user, it is very difficult to design a  
778 data treatment process that would enable making the records of Thies and  
779 Parsivel disdrometers compatible and comparable across studies.

## 780 **6. Acknowledgments**

781 This work has been supported by the research projects CGL2011-24185,  
782 CGL2014-52135-C3-1-R and CGL2017-83866-C3-3-R, financed by the Span-  
783 ish Ministerio de Economía, Industria y Competitividad (MINECO) and EU-  
784 FEDER. The work of M. Angulo-Martínez was supported by a postdoctoral  
785 grant by MINECO. We declare that we have no competing interests.

786 [76] Adirosi, E., Baldini, L., Roberto, N., Gatlin, P., Tokay, A. (2016). Im-

- 787        provement of vertical profiles of raindrop size distribution from micro  
788        rain radar using 2D video disdrometer measurements. *Atmos. Res.* 169-  
789        B, 404-415.
- 790 [76] Angulo-Martínez, M., Beguería, S., Kyselý, J. (2016). Use of disdrometer  
791        data to evaluate the relationship of rainfall kinetic energy and intensity  
792        (KE-I). *Sci. Total Environ.* 568, 83-94.
- 793 [92] Angulo-Martínez, M., and Barros, A.P. (2015). Measurement uncer-  
794        tainty in rainfall kinetic energy and intensity relationships for soil ero-  
795        sion studies: An evaluation using Parsivel disdrometers in the Southern  
796        Appalachian Mountains. *Geomorphology* 228, 28-40.
- 797 [71] Angulo-Martínez, M., Beguería, S., Navas, A., Machín, J. (2012). Splash  
798        erosion under natural rainfall on three soil types in NE Spain. *Geomor-  
799        phology* 175-176, 38-44.
- 800 [66] Atlas, D., Ulbrich, C.W., Marks J., Amitai, E., Williams, C.R. (1999).  
801        Systematic variation of drop size and radar-rainfall relations. *J. Geophys.  
802        Res.-Atmos.* 104, 6155-6169.
- 803 [83] Battaglia, A., Rustemeier, E., Tokay, A., Blahak, U., Simmer, C. (2010).  
804        Parsivel snow observations: A critical assessment. *J. Atmos. Ocean.  
805        Tech.* 27, 333-344.
- 806 [7] Beard, K.V. (1976). Terminal velocity and shape of cloud and precipi-  
807        tation drops aloft. *J. Atmos. Sci.* 33, 851–864.
- 808 [79] Beguería S., Latorre B., Angulo-Martínez M. (2017). disdRo: an  
809        R for working with disdrometric data, doi:10.5281/zenodo.834266.  
810        <https://github.com/sbegueria/disdRo>
- 811 [9] Bloemink, H.I., Lanzinger, E. (2005). Precipitation type from the Thies  
812        disdrometer. *WMO Technical Conference on Meteorological and En-  
813        vironmental Instruments and Methods of Observation (TECO- 2005)*,  
814        Bucharest, Romania, 4–7 May 2005, 3(11).



- 815 [90] Brawn, D., and Upton, G. (2008). On the measurement of atmospheric  
816 gamma drop-size distributions. *Atmos. Sci. Let.* 9, 245-247.
- 817 [85] Calheiros A.J.P., Machado L.A.T. (2014). Cloud and rain liquid water  
818 statistics in the CHUVA campaign. *Atmos. Meas. Tech.* 7, 2037-2046.
- 819 [83] Castro, A., Alonso-Blanco, E., González-Colino, M., Calvo, A. I.,  
820 Fernández-Raga M., Fraile R. (2010). Aerosol size distribution in pre-  
821 cipitation events in León, Spain. *Atmos. Res.* 96, 421-435.
- 822 [76] Ciaccioni, A., Bezak, N., Rusjan, S. (2010) Analysis of rainfall ero-  
823 sivity using disdrometer data at two stations in central Slovenia. *Acta*  
824 *hydrotechnica* 29/51, 89-101.
- 825 [91] Cruse, R., Flanagan, D., Frankenberger, J., Gelder, B., Herzmann, D.,  
826 James, D., Krajewski, W.F., Kraszewski, M., Laflen, J., Opsomer, J.,  
827 Todey, D. (2006) Daily estimates of rainfall, water runoff, and soil ero-  
828 sion in Iowa. *J. Soil Water Conserv.* 61, 191-199.
- 829 [88] Constantinescu, G. S., Krajewski, W. F., Ozdemir, C. E., Tokyay, T.  
830 (2007) Simulation of airflow around rain gauges: Comparison of LES  
831 with RANS models. *Adv. Water Resour.* 30(1), 43-58.
- 832 [16] Donnadiou, G., Dubosclard, G., Godard, S. (1969) Un pluviometre pho-  
833 toelectrique pour la determination simultanee des especes dimension-  
834 nel et de vitesse de chute des gouttes de pluie. *J. Rech. Atmos.* IV,  
835 37-46
- 836 [83] Fernández-Raga, M., Fraile, R., Keizer, J.J., Varela Teijeiro, M.E., Cas-  
837 tro, A., Palencia, C., Calvo, A.I., Koenders, J., Da Costa Marques, R.L.  
838 (2010). The kinetic energy of rain measured with an optical disdrometer:  
839 An application to splash erosion. *Atmos. Res.* 96, 225-240.
- 840 [80] Frasson, R.P.D.M., da Cunha, L.K., Krajewski, W.F. (2011). Assess-  
841 ment of the Thies optical disdrometer performance. *Atmos. Res.* 101,  
842 237-255.

- 843 [80] Frasson, R.P.D.M, Krajewski, W.F. (2011). Characterization of the  
844 drop-size distribution and velocity–diameter relation of the throughfall  
845 under the maize canopy. *Agric. For. Meteorol.* 151(9), 1244-1251.
- 846 [84] Friedrich, K., Higgins, S., Masters, F.J., Lopez, C.R. (2013). Articulat-  
847 ing and Stationary Parsivel Disdrometer Measurements in Conditions  
848 with Strong Winds and Heavy Rainfall. *J. Atmos. Ocean. Tech.* 30,  
849 2063-2080.
- 850 [76] Friedrich, K., Kalina, E.A., Aikins, J., Steiner, M., Gochis, D., Kucera,  
851 P.A., Ikeda, K., Sun, J. (2016). Raindrop size distribution and rain  
852 characteristics during the 2013 great Colorado flood. *J Hydrometeorol.*  
853 17, 53-72.
- 854 [76] Gires, A., Tchiguirinskaia, I., Schertzer, D. (2016). Multifractal compar-  
855 ison of the outputs of two optical disdrometers. *Hydrol. Sci. J.* 61, 9,  
856 1641-1651
- 857 [82] Habib, E., Krajewski, W.F. (2001). An example of computational ap-  
858 proach used for aerodynamic design of a rain disdrometer. *J. Hydraul.*  
859 *Res.* 39, 425-428.
- 860 [62] Hauser, D., Amayenc, P., Nutten, B., Waldteufel, P. (1984) A new opti-  
861 cal instrument for simultaneous measurement of raindrop diameter and  
862 fall speed distributions. *J. Atmos. Ocean. Tech.* 1, 256-269
- 863 [25] Illingworth, A.J., and Stevens, C.J. (1987). An Optical Disdrometer for  
864 the Measurement of Raindrop Size Spectra in Windy Conditions. *J.*  
865 *Atmos. Ocean. Tech.* 4, 411-421.
- 866 [76] Ioannidou, M.P., Kalogiros, J.A., Stavrakis, A.K. (2016). Comparison of  
867 the TRMM Precipitation Radar rainfall estimation with ground-based  
868 disdrometer and radar measurements in South Greece. *Atmos. Res.* 181,  
869 172-185.

- 870 [84] Iserloh, T., Ries, J.B., Arnáez, J., Boix-Fayos, C., Butzen, V., Cerdá,  
871 A., Echeverría, M.T., Fernández-Gálvez, J., Fister, W., Geibler, C., et  
872 al. (2013). European small portable rainfall simulators: A comparison  
873 of rainfall characteristics. *Catena* 110, 100-112.
- 874 [61] Iguchi, T., Kozu, T., Meneghini, R., Awaka, J., Okamoto, K. (2000)  
875 Rain-profiling algorithm for the TRMM precipitation radar. *J. Appl.*  
876 *Meteorol.* 39, 2038-2052.
- 877 [71] Jaffrain, J., and Berne, A. (2012). Quantification of the small-scale spa-  
878 tial structure of the raindrop size distribution from a network of dis-  
879 drometers. *J. Appl. Meteor. Climatol.* 51, 941-953.
- 880 [80] Jaffrain, J., and Berne, A. (2011). Experimental quantification of the  
881 sampling uncertainty associated with measurements from Parsivel dis-  
882 drometers. *J Hydrometeorol.* 12, 352-370.
- 883 [92] Jameson, A.R., Larsen, M.L., Kostinski, A.B.(2015). Disdrometer net-  
884 work observations of finescale spatial-temporal clustering in rain. *J. At-*  
885 *mos. Sci.* 72, 1648-1666.
- 886 [69] Jameson, A.R., Kostinski, A.B.(1998). Fluctuation properties of precip-  
887 itation. Part II: Reconsideration of the meaning and measurement of  
888 raindrop size distributions. *J. Atmos. Sci.* 55, 283-294.
- 889 [61] Jayawardena, A.W., Rezaur, R.B. (2000). Drop size distribution and  
890 kinetic energy load of rainstorms in Hong Kong. *Hydrol Process.* 14,  
891 1069-1082.
- 892 [34] Joss, J., and Waldvogel, A. (1967). Ein Spektrograph for Nieder-  
893 schlagstropfen mit automatischer Auswertung. *PAGEOPH* 68, 240-246.
- 894 [76] Kathiravelu, G., Lucke, T., and Nichols, P. (2016). Rain Drop Measure-  
895 ment Techniques: A Review. *Water* 8, 29.

- 896 [36] Kinnell, P.I.A. (1977) Some observations on Joss-Waldvogel rainfall  
897 disdrometer-reply. *J. Appl. Meteorol.* 16, 113-114.
- 898 [37] Kostinski, A.B., and Jameson, A.R.. (1997). Fluctuation properties of  
899 precipitation. Part I: On deviations of single-size drop counts from the  
900 poisson distribution. *J Atmos Sci.* 54, 2174-2186.
- 901 [91] Krajewski, W.F., Kruger, A., Caracciolo, C., Golé, P., Barthes, L., Cre-  
902 utin, J.-D., Delahaye, J.-Y., Nikolopoulos, E.I., Ogden, F., Vinson, J.-P.  
903 (2006). DEVEX-disdrometer evaluation experiment: Basic results and  
904 implications for hydrologic studies. *Adv. Water Resour.* 29, 311-325.
- 905 [69] Krajewski W.F., Kruger A., Nespor V.(1998). Experimental and numer-  
906 ical studies of small-scale rainfall measurements and variability. *Water*  
907 *Sci. Technol.* 37, 131-138.
- 908 [67] Kruger, A., Krajewski, W.F. (2002). Two-dimensional video disdrome-  
909 ter: A description. *J. Atmos. Ocean. Tech.* 19, 602-617.
- 910 [71] Lanza, L.G., Vuerich, E. (2012). Non-parametric analysis of one-minute  
911 rain intensity measurements from the WMO Field Intercomparison. *At-*  
912 *mos. Res.* 103, 52-59.
- 913 [42] Lanza, L.G., Vuerich, E. (2009). The WMO field intercomparison of rain  
914 intensity gauges. *Atmos. Res.* 94, 534-543.
- 915 [91] Lanzinger, E., Theel, M. and Windolph, H. (2006) Rainfall amount and  
916 intensity measured by the Thies laser precipitation monitor *WMO Tech-*  
917 *nical Conf. on Meteorological and Environmental Instruments and Meth-*  
918 *ods of Observation (TECO-2006)*, Geneva, Switzerland.
- 919 [85] Liao, L., Meneghini, R., Tokay, A. (2014) Uncertainties of GPM DPR  
920 rain estimates caused by DSD parameterizations. *J. Appl. Meteor. Cli-*  
921 *matol.* 53, 2524-2537.

- 922 [84] Lin, M., Lucas, H. C., Shmueli, G. (2013). Too big to fail: Large samples  
923 and the p-value problem. *Information Systems Research* 24(4), 906-917.
- 924 [82] Löffler-Mang, M., Blahak U. (2001). Estimation of the equivalent radar  
925 reflectivity factor from measured snow size spectra. *J. Appl. Meteor.* 40,  
926 843-849.
- 927 [61] Löffler-Mang, M., Joss, J. (2000). An optical disdrometer for measuring  
928 size and velocity of hydrometeors. *J. Atmos. Ocean. Tech.* 17, 130-139.
- 929 [48] Löffler-Mang, M., Beheng, K.D., Gysi, H. (1996). Drop size distribution  
930 measurements in rain - A comparison of two sizing methods. *Meteorol*  
931 *Z.* 5, 139-144.
- 932 [54] Loik, M.E., Breshears, D.D., Lauenroth, W.K., and Belnap, J. (2004).  
933 A multi-scale perspective of water pulses in dryland ecosystems: Clima-  
934 tology and ecohydrology of the western USA. *Oecologia* 141, 269-281.
- 935 [83] Marzano, F.S., Cimini, D., Montopoli, M. (2010). Investigating precip-  
936 itation microphysics using ground-based microwave remote sensors and  
937 disdrometer data. *Atmos. Res.* 97-4, 583-600.
- 938 [54] Miriovsky B.J., Bradley A.A., Eichinger W.E., Krajewski W.F., Kruger  
939 A., Nelson B.R., Creutin J.-D., Lapetite J.-M., Lee G.W., Zawadzki I.,  
940 Ogden F.L. (2004). An experimental study of small-scale variability of  
941 radar reflectivity using disdrometer observations. *J. Appl. Meteor.* 43,  
942 106-118.
- 943 [76] Montero-Martínez, G., Torres-Pérez, E.F., García-García, F. (2016). A  
944 comparison of two optical precipitation sensors with different operating  
945 principles: The PWS100 and the OAP-2DP *Atmos. Res.* 178-179, 550-  
946 558.
- 947 [76] Muñoz P., Céleri R., Feyen J. (2016). Effect of the resolution of tipping-  
948 bucket rain gauge and calculation method on rainfall intensities in an  
949 andean mountain gradient. *Water* 8, 534.

- 950 [54] Nanko, K., HOTTa, N., Suzuki, M. (2004). Assessing raindrop impact  
951 energy at the forest floor in a mature Japanese cypress plantation using  
952 continuous raindrop-sizing instruments. *Journal of Forest Research* 9(2)  
953 157-164.
- 954 [84] Nanko, K., Watanabe, A., HOTTa, N., Suzuki, M. (2013). Physical  
955 interpretation of the difference in drop size distributions of leaf drips  
956 among tree species. *Agric. For. Meteorol.* 169, 74-84.
- 957 [61] Nešpor, V., Krajewski, W.F., Kruger, A. (2000). Wind-Induced Error  
958 of Raindrop Size Distribution Measurement Using a Two-Dimensional  
959 Video Disdrometer. *J. Atmos. Ocean. Tech.* 17, 1483-1492.
- 960 [66] Nystuen J.A. (1999). Relative performance of automatic rain gauges  
961 under different rainfall conditions. *J. Atmos. Ocean. Tech.* 16, 1025-  
962 1043.
- 963 [58] Olsen, R.L., Rogers, D.V., Hodge, D.B. (1978). The aRb Relation in the  
964 Calculation of Rain Attenuation. *IEEE Transactions on Antennas and*  
965 *Propagation* 26, 318-329.
- 966 [79] Park, S.G., Kim, H.L., Ham, Y.W., Jung, S.H. (2017). Comparative  
967 Evaluation of the OTT Parsivel2 Using a collocated 2-Dimensional  
968 Video Disdrometer. *J. Atmos. Ocean. Tech.* 10.1175/JTECH-D-16-  
969 0256.1
- 970 [83] Petan, S., Rusjan, S., Vidmar, A., Mikos, M. (2010). The rainfall ki-  
971 netic energy-intensity relationship for rainfall erosivity estimation in the  
972 mediterranean part of Slovenia. *J. Hydrol.* 391, 314-321.
- 973 [61] Pinheiro, J. C., Bates, D. M. (2000). Mixed-effects models in S and  
974 S-PLUS. New York: Springer.
- 975 [62] Raasch, J., Umhauer, H., 1984. Errors in the determination of particle  
976 size distributions caused by coincidences in optical particle counters.  
977 *Particle Characterization* 1, 53-58.

- 978 [76] Raupach, T. H., Berne A. (2016). Spatial interpolation of experimental  
979 raindrop size distribution spectra. *Q. J. Royal Meteorol. Soc.* 142, 125-  
980 137.
- 981 [92] Raupach, T. H., Berne A. (2015). Correction of raindrop size distribu-  
982 tions measured by Parsivel disdrometers, using a two-dimensional video  
983 disdrometer as a reference. *Atmos. Meas. Tech.* 8, 343-365.
- 984 [65] Rosewell, C.J. (1986). Rainfall kinetic energy in Eastern Australia. *J.*  
985 *Climate Appl. Meteor.* 25, 1695-1701.
- 986 [66] Salles, C., Sempere-Torres, D., Creutin, J.D. (1999). Characterisation  
987 of raindrop size distribution in Mediterranean climate: analysis of the  
988 variations on the Z-R relationship. *Proceedings of the 29th Conference*  
989 *on Radar Meteorology* AMS, Montreal, Canada.
- 990 [67] Salles, C., Poesen, J., Sempere-Tores, D. (2002). Kinetic energy of rain  
991 and its functional relationship with intensity. *J. Hydrol.* 257, 256-270.
- 992 [71] Sánchez-Moreno, J.F., Mannaerts, C.M., Jetten, V., Löffler-Mang,  
993 M. (2012). Rainfall kinetic energy-intensity and rainfall momentum-  
994 intensity relationships for Cape Verde. *J. Hydrol.* 454-455, 131-140.
- 995 [69] Sempere-Torres, D., Porra, J.M., Creutin, J.D. (1998). Experimental  
996 evidence of a general description for raindrop size distribution properties.  
997 *J. Geophys. Res.* 103, 1785-1797.
- 998 [70] Sheppard B.E., Joe P.I. (1994). Comparison of raindrop size distribution  
999 measurements by a Joss- Waldvogel disdrometer, a PMS 2DG spectrom-  
1000 eter, and a POSS Doppler radar. *J. Atmos. Ocean. Tech.* 11, 874-887.
- 1001 [71] Shuttleworth, W.J. (2012). Terrestrial Hydrometeorology. Wiley-  
1002 Blackwell. 472p.

- 1003 [76] Tan, J., Petersen, W.A., Tokay, A. (2016). A novel approach to identify  
1004 sources of errors in IMERG for GPM ground validation. *J. Hydrometeo-*  
1005 *rol.* 17, 2477-2491.
- 1006 [79] Tapiador, F. J., Navarro, A., Levizzani, V., García-Ortega, E., Huff-  
1007 man, G.J., Kidd, C., Kucera, P.A., Kummerow, C.D., Masunaga, H.,  
1008 Petersen, W.A., Roca, R., Sánchez, J.L. (2017) Global precipitation  
1009 measurements for validating climate models. *Atmos. Res.* 197, 1-20.
- 1010 [76] Tapiador, F. J., Navarro, A., Moreno, R., Jiménez-Alcázar, A., Marcos,  
1011 C., Tokay, A., Durán, L., Bodoque, J. M., Martín, R., Petersen, W.A., de  
1012 Castro, M. (2016) On the Optimal Measuring Area for Pointwise Rainfall  
1013 Estimation: A Dedicated Experiment with 14 Laser Disdrometers. *J.*  
1014 *Hydrometeorol.* 18, 753-760.
- 1015 [83] Tapiador, F. J., Checa, R., de Castro, M. (2010). An experiment to  
1016 measure the spatial variability of rain drop size distribution using sixteen  
1017 laser disdrometers. *Geoph. Res. Lett.* 37, L16803.
- 1018 [76] Testik F.Y., Rahman M.K. (2016). High-speed optical disdrometer for  
1019 rainfall microphysical observations. *J. Atmos. Ocean. Tech.* 33, 231-243.
- 1020 [82] Testud, J., Oury, S., Black, R.A., Amayenc, P., and Dou, X. (2001).  
1021 The concept of normalized distribution to describe raindrop spectra: A  
1022 tool for cloud physics and cloud remote sensing. *J. Appl. Meteorol.* 40,  
1023 1118-1140.
- 1024 [80] Thurai, M. Bringi, V.N., Petersen, W.A., Gatlin, P.M. (2013). Drop  
1025 shapes and fall speeds in rain: two contrasting examples. *J. Appl. Me-*  
1026 *teorol. Climatol.* 52, 2567-2581.
- 1027 [79] Thurai, M., Gatlin, P., Bringi, V.N., Petersen, W., Kennedy, P., No-  
1028 taroš, B., Carey, L. (2017). Toward completing the raindrop size spec-  
1029 trum: Case studies involving 2D-video disdrometer, droplet spectrome-



- 1030 ter, and polarimetric radar measurements. *J. Appl. Meteor. Climate* 56  
1031 (4), 877–896.
- 1032 [80] Thurai, M., Petersen, W.A., Tokay, A. (2011). Drop size distribution  
1033 comparisons between Parsivel and 2-D video disdrometers. *Adv. Geosci.*  
1034 30, 3-9.
- 1035 [90] Thurai, M., Bringi, V.N.(2008). Rain microstructure from polarimetric  
1036 radar and advanced disdrometers. Michaelides S. (eds) *Precipitation:  
1037 Advances in Measurement, Estimation and Prediction*. Springer, Berlin,  
1038 Heidelberg, 233-284.
- 1039 [82] Tokay, A., Kruger, A., and Krajewski, W.F. (2001). Comparison of drop  
1040 size distribution measurements by impact and optical disdrometers. *J.*  
1041 *Appl. Meteorol.* 40, 2083-2097.
- 1042 [83] Tokay, A., Bashor, P.G. (2010). An experimental study of small-scale  
1043 variability of raindrop size distribution. *J. Appl. Meteor.* 49, 2348-2365.
- 1044 [84] Tokay, A., Petersen, W.A., Gatlin, P., Wingo, M. (2013). Comparison  
1045 of raindrop size distribution measurements by collocated disdrometers.  
1046 *J. Atmos. Ocean. Tech.* 30, 1672-1690.
- 1047 [85] Tokay, A., Wolff, D.B., Petersen, W.A. (2014). Evaluation of the new  
1048 version of the laser-optical disdrometer, OTT Parsivel2. *J. Atmos.*  
1049 *Ocean. Tech.* 31, 1276-1288.
- 1050 [91] Uijlenhoet, R., Sempere-Torres, D. (2006). Measurement and parame-  
1051 terization of rainfall microstructure. *J. Hydrol.* 328, 1-7.
- 1052 [87] Ulbrich, C.W. (1983). Natural variations in the analytical form of the  
1053 raindrop size distribution. *J. Clim. Appl. Meteorol.* 22, 1764-1775.
- 1054 [88] Ulbrich, C.W., Atlas, D. (2007). Microphysics of raindrop size spectra:  
1055 Tropical continental and maritime storms. *J Appl Meteorol Clim.* 46,  
1056 1777-1791.

- 1057 [89] Uplinger, C.W. (1981) A new formula for raindrop terminal velocity.  
1058 *20th Conference of radar meteorology*. American Meteorology Society,  
1059 Boston (USA) 389-391.
- 1060 [90] Upton, G., Brawn, D. (2008). An investigation of factors affecting the  
1061 accuracy of Thies disdrometers. *WMO Technical Conference on Instru-*  
1062 *ments and Methods of Observation (TECO-2008)*, St. Petersburg, Rus-  
1063 sian Federation, pp. 27-29.
- 1064 [91] Yuter, S. E., Kingsmill, D. E., Nance, L. B., Löffler-Mang, M. (2006).  
1065 Observations of precipitation size and fall speed characteristics within  
1066 coexisting rain and wet snow. *J. Appl. Meteorol. Climatol.* 45, 1450-1464.
- 1067 [92] Zhang, L., Zhao, L., Xie, C., Liu, G., Gao, L., Xiao, Y., Shi, J., Qiao, Y.  
1068 (2015). Intercomparison of Solid Precipitation Derived from the Weight-  
1069 ing Rain Gauge and Optical Instruments in the Interior Qinghai-Tibetan  
1070 Plateau. *Adv. Meteorol.* 2015, 936724, 11 pages.

1071 [TABLES AND FIGURES]

Table 1: Classification of particles according to equivalent diameter ( $D$ ) and fall velocity ( $V$ ) bins by disdrometer type.

| Size bins (mm) |                          | Velocity bins (m s <sup>-1</sup> ) |           |
|----------------|--------------------------|------------------------------------|-----------|
| Thies          | Parsivel                 | Thies                              | Parsivel  |
|                | 0.000–0.125 <sup>a</sup> |                                    | 0.0–0.1   |
| 0.125–0.250    | 0.125–0.250 <sup>a</sup> | 0.0–0.2                            | 0.1–0.2   |
| 0.250–0.375    | 0.250–0.375              | 0.2–0.4                            | 0.2–0.3   |
| 0.375–0.500    | 0.375–0.500              | 0.4–0.6                            | 0.3–0.4   |
| 0.500–0.750    | 0.500–0.625              | 0.6–0.8                            | 0.4–0.5   |
| 0.750–1.000    | 0.625–0.750              | 0.8–1.0                            | 0.5–0.6   |
| 1.000–1.250    | 0.750–0.875              | 1.0–1.4                            | 0.6–0.7   |
| 1.250–1.500    | 0.875–1.000              | 1.4–1.8                            | 0.7–0.8   |
| 1.500–1.750    | 1.000–1.125              | 1.8–2.2                            | 0.8–0.9   |
| 1.750–2.000    | 1.125–1.250              | 2.2–2.6                            | 0.9–1.25  |
| 2.000–2.500    | 1.250–1.500              | 2.6–3.0                            | 1.03–1.2  |
| 2.500–3.000    | 1.500–1.750              | 3.0–3.4                            | 1.2–1.4   |
| 3.000–3.500    | 1.750–2.000              | 3.4–4.2                            | 1.4–1.6   |
| 3.500–4.000    | 2.000–2.250              | 4.2–5.0                            | 1.6–1.8   |
| 4.000–4.500    | 2.250–2.575              | 5.0–5.8                            | 1.8–2.05  |
| 4.500–5.000    | 2.575–3.000              | 5.8–6.6                            | 2.05–2.4  |
| 5.000–5.500    | 3.000–3.500              | 6.6–7.4                            | 2.4–2.8   |
| 5.500–6.000    | 3.500–4.000              | 7.4–8.2                            | 2.8–3.2   |
| 6.000–6.500    | 4.000–4.500              | 8.2–9.0                            | 3.2–3.6   |
| 6.500–7.000    | 4.500–5.125              | 9.0–10.0                           | 3.6–4.1   |
| 7.000–7.500    | 5.125–6.000              | > 10.0                             | 4.1–4.8   |
| 7.500–8.000    | 6.000–7.000              |                                    | 4.8–5.6   |
| > 8.000        | 7.000–8.000              |                                    | 5.6–6.4   |
|                | 8.000–9.000              |                                    | 6.4–7.2   |
|                | 9.000–10.250             |                                    | 7.2–8.2   |
|                | 10.250–12.000            |                                    | 8.2–9.6   |
|                | 12.000–14.000            |                                    | 9.6–11.2  |
|                | 14.000–16.000            |                                    | 11.2–12.8 |
|                | 16.000–18.000            |                                    | 12.8–14.4 |
|                | 18.000–20.000            |                                    | 14.4–16.4 |
|                | 20.000–23.000            |                                    | 16.4–19.2 |
|                | 23.000–26.000            |                                    | 19.2–21.4 |

<sup>a</sup> Left empty by the manufacturer.

Table 2: Disdrometer evaluated variables.  $M$  and  $m$  stand for maximum and mean, respectively.

| Variables                 | Units                            | Acronym     |
|---------------------------|----------------------------------|-------------|
| Rain rate, mean and max   | $\text{mm h}^{-1}$               | $R, Rm, RM$ |
| Precipitation accumulated | mm                               | $P$         |
| Number of particles       | $\text{min}^{-1}$                | $NP, NPm$   |
| Particle density          | $\text{m}^{-3} \text{mm}^{-1}$   | $ND, NDm$   |
| Radar reflectivity        | dBZ                              | $Z$         |
| Kinetic energy            | $\text{J m}^{-2} \text{mm}^{-1}$ | $E, Em, EM$ |
| 10th PSD percentile       | mm                               | $D10$       |
| 50th PSD percentile       | mm                               | $D50$       |
| 90th PSD percentile       | mm                               | $D90$       |
| Mean PSD                  | mm                               | $Dm$        |
| 10th PVD percentile       | $\text{m s}^{-1}$                | $V10$       |
| 50th PVD percentile       | $\text{m s}^{-1}$                | $V50$       |
| 90th PVD percentile       | $\text{m s}^{-1}$                | $V90$       |
| Mean PVD                  | mm                               | $Vm$        |

Table 3: Disdrometer data summary. Number of minutes recorded, errors, minutes with rain (SYNOP codes 61, 63 and 65), and high quality minutes; percentage of records in each season, and by rain intensity ranges; and maximum rain intensity.

|                                    | T1     | T2     | P1     | P2     |
|------------------------------------|--------|--------|--------|--------|
| Total minutes                      | 98,861 | 99,290 | 92,029 | 74,608 |
| Error flags                        | 20     | 33     | 240    | 103    |
| Rain minutes                       | 30,359 | 30,507 | 25,299 | 18,376 |
| % rain minutes                     | 30.7   | 30.7   | 27.5   | 24.6   |
| High quality rain minutes          | 25,357 | 25,688 | 23,895 | 18,376 |
| Common, high quality, rain minutes | 11,659 | 11,659 | 11,659 | 11,659 |
| % rain minutes in winter           | 27.7   | 27.7   | 28.7   | 33.7   |
| % rain minutes in spring           | 26.6   | 26.1   | 25.3   | 10.9   |
| % rain minutes in summer           | 11.1   | 11.1   | 11.1   | 11.9   |
| % rain minutes in autumn           | 34.6   | 35.2   | 35.0   | 43.5   |
| % minutes 0.1-2 mm h <sup>-1</sup> | 84.6   | 83.6   | 86.8   | 85.8   |
| % minutes 2-5 mm h <sup>-1</sup>   | 11.9   | 12.4   | 10.4   | 11.1   |
| % minutes 5-10 mm h <sup>-1</sup>  | 2.3    | 2.8    | 1.9    | 2.0    |
| % minutes 10-25 mm h <sup>-1</sup> | 0.75   | 0.8    | 0.7    | 0.59   |
| % minutes >25 mm h <sup>-1</sup>   | 0.43   | 0.46   | 0.3    | 0.49   |
| Lowest $R$ (mm h <sup>-1</sup> )   | 0.018  | 0.020  | 0.015  | 0.014  |
| Highest $R$ (mm h <sup>-1</sup> )  | 251    | 277    | 170    | 169    |

Table 4: Gamma Generalized Linear Mixed-Effects Model coefficients for one-minute records (random sample size of  $N = 1000$ ). Refer to Table 2 for a list of acronyms of response variables.

| Response variable | Fixed effects |                        |          |                      | Random effects         |           |
|-------------------|---------------|------------------------|----------|----------------------|------------------------|-----------|
|                   | Thies         |                        | Parsivel |                      | Mast                   | Residual  |
|                   | coeff         | p-value                | coeff    | p-value              | std. dev.              | std. dev. |
| <i>NP</i>         | 230.1         | $<2 \times 10^{-16}$   | 193.8    | $<2 \times 10^{-16}$ | 0.000                  | 0.8719    |
| <i>D10</i>        | 0.3374        | $<2 \times 10^{-16}$   | 0.4772   | $<2 \times 10^{-16}$ | $3.614 \times 10^{-3}$ | 0.1730    |
| <i>D50</i>        | 0.5956        | $<2 \times 10^{-16}$   | 0.7420   | $<2 \times 10^{-16}$ | $1.488 \times 10^{-3}$ | 0.1899    |
| <i>D90</i>        | 1.012         | $<2 \times 10^{-16}$   | 1.026    | $<2 \times 10^{-16}$ | 0.000                  | 0.209     |
| <i>V10</i>        | 1.316         | $<2 \times 10^{-16}$   | 1.793    | $<2 \times 10^{-16}$ | $1.716 \times 10^{-2}$ | 0.2097    |
| <i>V50</i>        | 2.399         | $<2 \times 10^{-16}$   | 2.875    | $<2 \times 10^{-16}$ | $2.450 \times 10^{-2}$ | 0.1646    |
| <i>V90</i>        | 3.818         | $<2 \times 10^{-16}$   | 3.608    | $<2 \times 10^{-16}$ | $1.200 \times 10^{-2}$ | 0.1445    |
| <i>R</i>          | 1.440         | $1.659 \times 10^{-7}$ | 1.254    | $<2 \times 10^{-16}$ | $2.292 \times 10^{-8}$ | 1.467     |
| <i>ND</i>         | 21,600        | $<2 \times 10^{-16}$   | 15,920   | $<2 \times 10^{-16}$ | 0.000                  | 0.578     |
| <i>Z</i>          | 24.55         | $<2 \times 10^{-16}$   | 23.23    | $<2 \times 10^{-16}$ | 0.000                  | 0.2828    |
| <i>E</i>          | 11.09         | $<2 \times 10^{-16}$   | 9.660    | $<2 \times 10^{-16}$ | $2.099 \times 10^{-8}$ | 0.4912    |

Table 5: Gamma Generalized Linear Mixed-Effects Models coefficients for event totals (sample size  $N = 624$ ). Refer to Table 2 for a list of variable acronyms.

| Response variable | Fixed effects |                      |          |                      | Random effects         |           |
|-------------------|---------------|----------------------|----------|----------------------|------------------------|-----------|
|                   | Thies         |                      | Parsivel |                      | Mast                   | Residual  |
|                   | coeff         | p-value              | coeff    | p-value              | std. dev.              | std. dev. |
| <i>NP</i>         | 167.5         | $<2 \times 10^{-16}$ | 146.3    | $<2 \times 10^{-16}$ | 0.000                  | 0.8463    |
| <i>D10m</i>       | 0.3448        | $<2 \times 10^{-16}$ | 0.4909   | $<2 \times 10^{-16}$ | $3.073 \times 10^{-3}$ | 0.1629    |
| <i>D50m</i>       | 0.6061        | $<2 \times 10^{-16}$ | 0.7560   | $<2 \times 10^{-16}$ | 0.000                  | 0.1564    |
| <i>D90m</i>       | 0.9971        | $<2 \times 10^{-16}$ | 1.027    | $<2 \times 10^{-16}$ | 0.000                  | 0.1566    |
| <i>V10m</i>       | 1.351         | $<2 \times 10^{-16}$ | 1.826    | $<2 \times 10^{-16}$ | $2.027 \times 10^{-2}$ | 0.2036    |
| <i>V50m</i>       | 2.465         | $<2 \times 10^{-16}$ | 2.876    | $<2 \times 10^{-16}$ | $2.607 \times 10^{-2}$ | 0.1375    |
| <i>V90m</i>       | 3.791         | $<2 \times 10^{-16}$ | 3.597    | $<2 \times 10^{-16}$ | $1.907 \times 10^{-2}$ | 0.1114    |
| <i>Rm</i>         | 1.051         | $<2 \times 10^{-16}$ | 0.9615   | $<2 \times 10^{-16}$ | 0.000                  | 1.063     |
| <i>RM</i>         | 3.351         | $<2 \times 10^{-16}$ | 3.430    | $<2 \times 10^{-16}$ | $6.788 \times 10^{-8}$ | 1.584     |
| <i>NDm</i>        | 20,780        | $<2 \times 10^{-16}$ | 15,930   | $<2 \times 10^{-16}$ | $9.283 \times 10^{-5}$ | 0.4714    |
| <i>Em</i>         | 11.03         | $<2 \times 10^{-16}$ | 9.505    | $<2 \times 10^{-16}$ | $1.867 \times 10^{-7}$ | 0.3792    |
| <i>Zm</i>         | 22.75         | $<2 \times 10^{-16}$ | 21.55    | $<2 \times 10^{-16}$ | $1.872 \times 10^{-7}$ | 0.2068    |

Table 6: Gamma Generalized Linear Mixed-Effects Model coefficients for minutes with varying rainfall intensities.

| Response variable                                              | Fixed effects |                        |          |                       | Random effects          |                        |
|----------------------------------------------------------------|---------------|------------------------|----------|-----------------------|-------------------------|------------------------|
|                                                                | Thies         |                        | Parsivel |                       | Mast                    | Residual               |
|                                                                | coeff         | p-value                | coeff    | p-value               | std. dev.               | std. dev.              |
| Low rainfall intensity ( $0.1 < I < 2$ mm h <sup>-1</sup> ):   |               |                        |          |                       |                         |                        |
| <i>NP</i>                                                      | 145.8         | $< 2 \times 10^{-16}$  | 136.1    | $< 2 \times 10^{-16}$ | $1.132 \times 10^{-7}$  | 0.7129                 |
| <i>D10</i>                                                     | 0.3481        | $< 2 \times 10^{-16}$  | 0.4723   | $< 2 \times 10^{-16}$ | $3.795 \times 10^{-3}$  | 0.1758                 |
| <i>D50</i>                                                     | 0.5975        | $< 2 \times 10^{-16}$  | 0.7109   | $< 2 \times 10^{-16}$ | $3.160 \times 10^{-3}$  | 0.1765                 |
| <i>D90</i>                                                     | 0.9440        | $< 2 \times 10^{-16}$  | 0.9503   | $< 2 \times 10^{-16}$ | 0.000                   | 0.1650                 |
| <i>V10</i>                                                     | 1.365         | $< 2 \times 10^{-16}$  | 1.762    | $< 2 \times 10^{-16}$ | $2.189 \times 10^{-2}$  | 0.2156                 |
| <i>V50</i>                                                     | 2.416         | $< 2 \times 10^{-16}$  | 2.768    | $< 2 \times 10^{-16}$ | $2.189 \times 10^{-2}$  | 0.2156                 |
| <i>V90</i>                                                     | 3.639         | $< 2 \times 10^{-16}$  | 3.425    | $< 2 \times 10^{-16}$ | $1.145 \times 10^{-2}$  | 0.1202                 |
| <i>R</i>                                                       | 0.6675        | $1.659 \times 10^{-7}$ | 0.6202   | $< 2 \times 10^{-16}$ | 0.000                   | 0.6570                 |
| <i>ND</i>                                                      | 24,840        | $< 2 \times 10^{-16}$  | 18,710   | $< 2 \times 10^{-16}$ | $9.824 \times 10^{-3}$  | 0.5478                 |
| <i>Z</i>                                                       | 21.44         | $< 2 \times 10^{-16}$  | 20.45    | $< 2 \times 10^{-16}$ | 0.000                   | 0.2281                 |
| <i>E</i>                                                       | 9.434         | $< 2 \times 10^{-16}$  | 7.953    | $< 2 \times 10^{-16}$ | $1.113 \times 10^{-2}$  | 0.4108                 |
| Medium rainfall intensity ( $2 < I < 10$ mm h <sup>-1</sup> ): |               |                        |          |                       |                         |                        |
| <i>NP</i>                                                      | 519.2         | $< 2 \times 10^{-16}$  | 408.1    | $< 2 \times 10^{-16}$ | $3.144 \times 10^{-9}$  | 0.4014                 |
| <i>D10</i>                                                     | 0.3122        | $< 2 \times 10^{-16}$  | 0.4944   | $< 2 \times 10^{-16}$ | $1.681 \times 10^{-3}$  | 0.1232                 |
| <i>D50</i>                                                     | 0.5936        | $< 2 \times 10^{-16}$  | 0.8246   | $< 2 \times 10^{-16}$ | $7.793 \times 10^{-4}$  | 0.1592                 |
| <i>D90</i>                                                     | 1.525         | $< 2 \times 10^{-16}$  | 1.772    | $< 2 \times 10^{-16}$ | $1.203 \times 10^{-10}$ | 0.1268                 |
| <i>V10</i>                                                     | 1.177         | $< 2 \times 10^{-16}$  | 1.893    | $< 2 \times 10^{-16}$ | $8.798 \times 10^{-3}$  | 0.1666                 |
| <i>V50</i>                                                     | 2.420         | $< 2 \times 10^{-16}$  | 3.133    | $< 2 \times 10^{-16}$ | $2.348 \times 10^{-2}$  | 0.1587                 |
| <i>V90</i>                                                     | 4.488         | $< 2 \times 10^{-16}$  | 4.147    | $< 2 \times 10^{-16}$ | $3.325 \times 10^{-2}$  | $9.908 \times 10^{-2}$ |
| <i>R</i>                                                       | 4.048         | $1.659 \times 10^{-7}$ | 3.596    | $< 2 \times 10^{-16}$ | $1.145 \times 10^{-2}$  | 0.1202                 |
| <i>ND</i>                                                      | 13,730        | $< 2 \times 10^{-16}$  | 8,228    | $< 2 \times 10^{-16}$ | $6.932 \times 10^{-3}$  | 0.3899                 |
| <i>Z</i>                                                       | 34.26         | $< 2 \times 10^{-16}$  | 32.22    | $< 2 \times 10^{-16}$ | $7.137 \times 10^{-3}$  | 0.1092                 |
| <i>E</i>                                                       | 15.09         | $< 2 \times 10^{-16}$  | 13.95    | $< 2 \times 10^{-16}$ | $7.105 \times 10^{-3}$  | 0.3521                 |
| High rainfall intensities ( $I > 10$ mm h <sup>-1</sup> ):     |               |                        |          |                       |                         |                        |
| <i>NP</i>                                                      | 1367.0        | $< 2 \times 10^{-16}$  | 829.7    | $< 2 \times 10^{-16}$ | $9.263 \times 10^{-9}$  | 0.3532                 |
| <i>D10</i>                                                     | 0.287         | $< 2 \times 10^{-16}$  | 0.5391   | $< 2 \times 10^{-16}$ | 0.000                   | 0.1866                 |
| <i>D50</i>                                                     | 0.510         | $< 2 \times 10^{-16}$  | 1.030    | $< 2 \times 10^{-16}$ | 0.000                   | 0.2777                 |
| <i>D90</i>                                                     | 1.525         | $< 2 \times 10^{-16}$  | 1.772    | $< 2 \times 10^{-16}$ | $1.645 \times 10^{-2}$  | 0.1560                 |
| <i>V10</i>                                                     | 1.015         | $< 2 \times 10^{-16}$  | 2.047    | $< 2 \times 10^{-16}$ | 0.000                   | 0.2213                 |
| <i>V50</i>                                                     | 2.012         | $< 2 \times 10^{-16}$  | 3.529    | $< 2 \times 10^{-16}$ | 0.000                   | 0.2672                 |
| <i>V90</i>                                                     | 4.992         | $< 2 \times 10^{-16}$  | 4.467    | $< 2 \times 10^{-16}$ | 0.000                   | 0.1196                 |
| <i>R</i>                                                       | 15.94         | $1.659 \times 10^{-7}$ | 14.33    | $< 2 \times 10^{-16}$ | $2.374 \times 10^{-2}$  | 0.2910                 |
| <i>ND</i>                                                      | 10,370        | $< 2 \times 10^{-16}$  | 3,544    | $< 2 \times 10^{-16}$ | 0.000                   | 0.428                  |
| <i>Z</i>                                                       | 43.05         | $< 2 \times 10^{-16}$  | 40.88    | $< 2 \times 10^{-16}$ | $9.882 \times 10^{-3}$  | $8.927 \times 10^{-2}$ |
| <i>E</i>                                                       | 19.84         | $< 2 \times 10^{-16}$  | 20.81    | $< 2 \times 10^{-16}$ | $5.844 \times 10^{-9}$  | 0.3198                 |

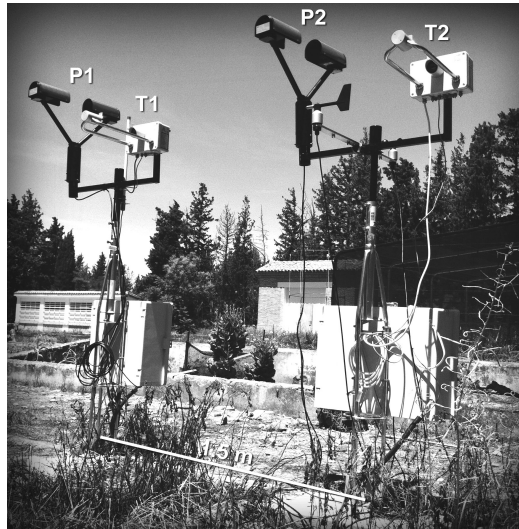

Figure 1: Sampling site with four collocated disdrometers: two Parsivel<sup>2</sup> (P1 and P2, with serial numbers 304555 and 304553); and two Thies (T1 and T2, with serial numbers 0436 and 0655).



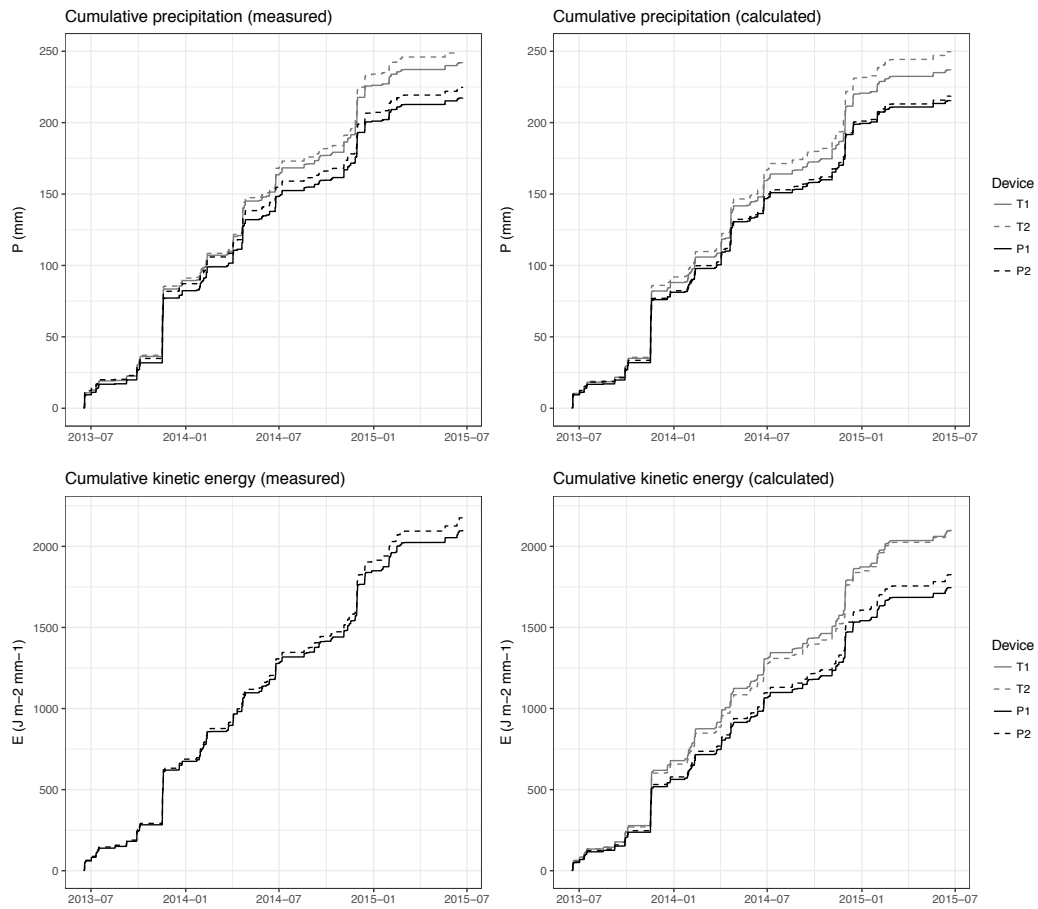

Figure 2: Accumulated precipitation ( $R$ , mm) and kinetic energy ( $E$ ,  $J m^{-2} mm^{-1}$ ) during the two years experiment (only the minutes with data on the four disdrometers are used).

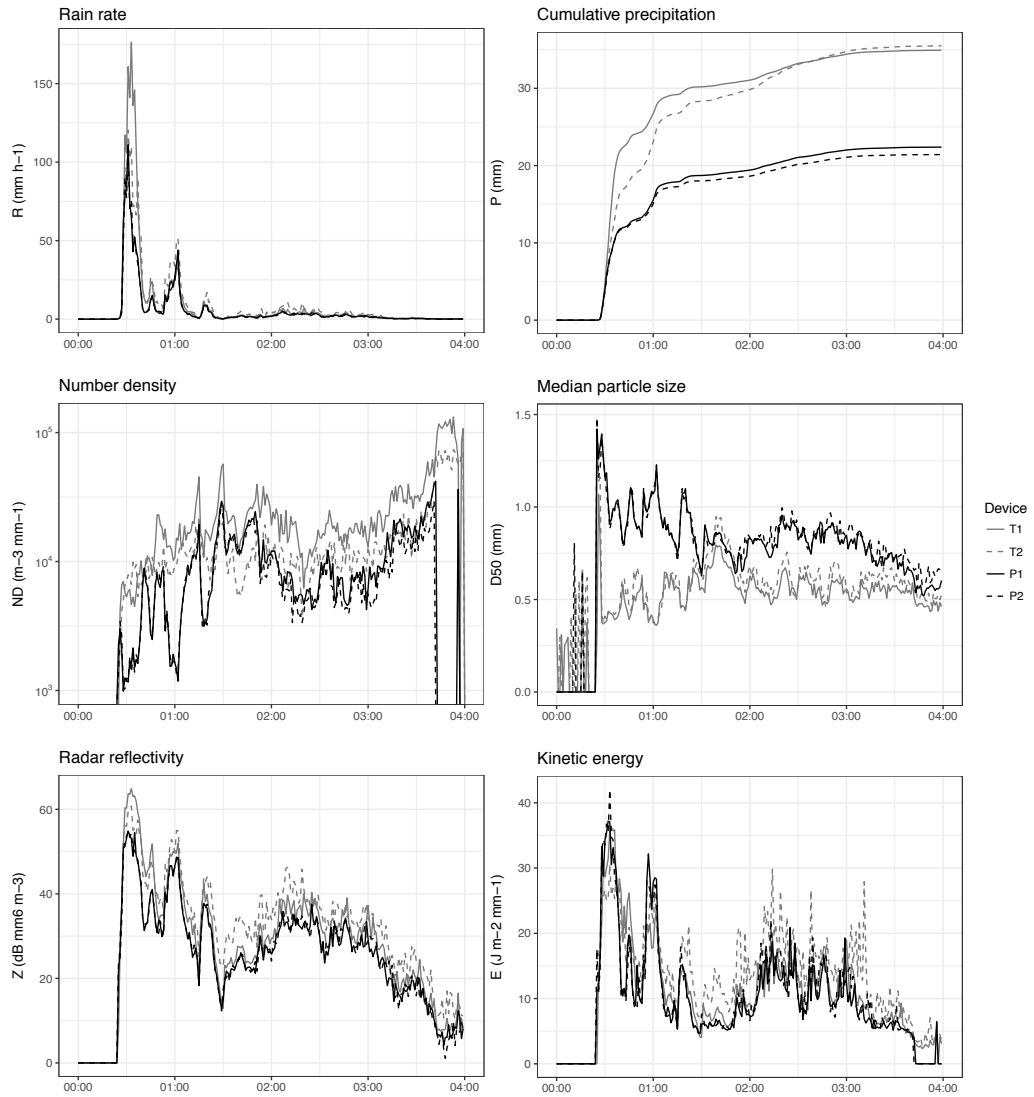

Figure 3: Time series of disdrometer bulk variables during a high-intensity event (E365, 25/11/2014).

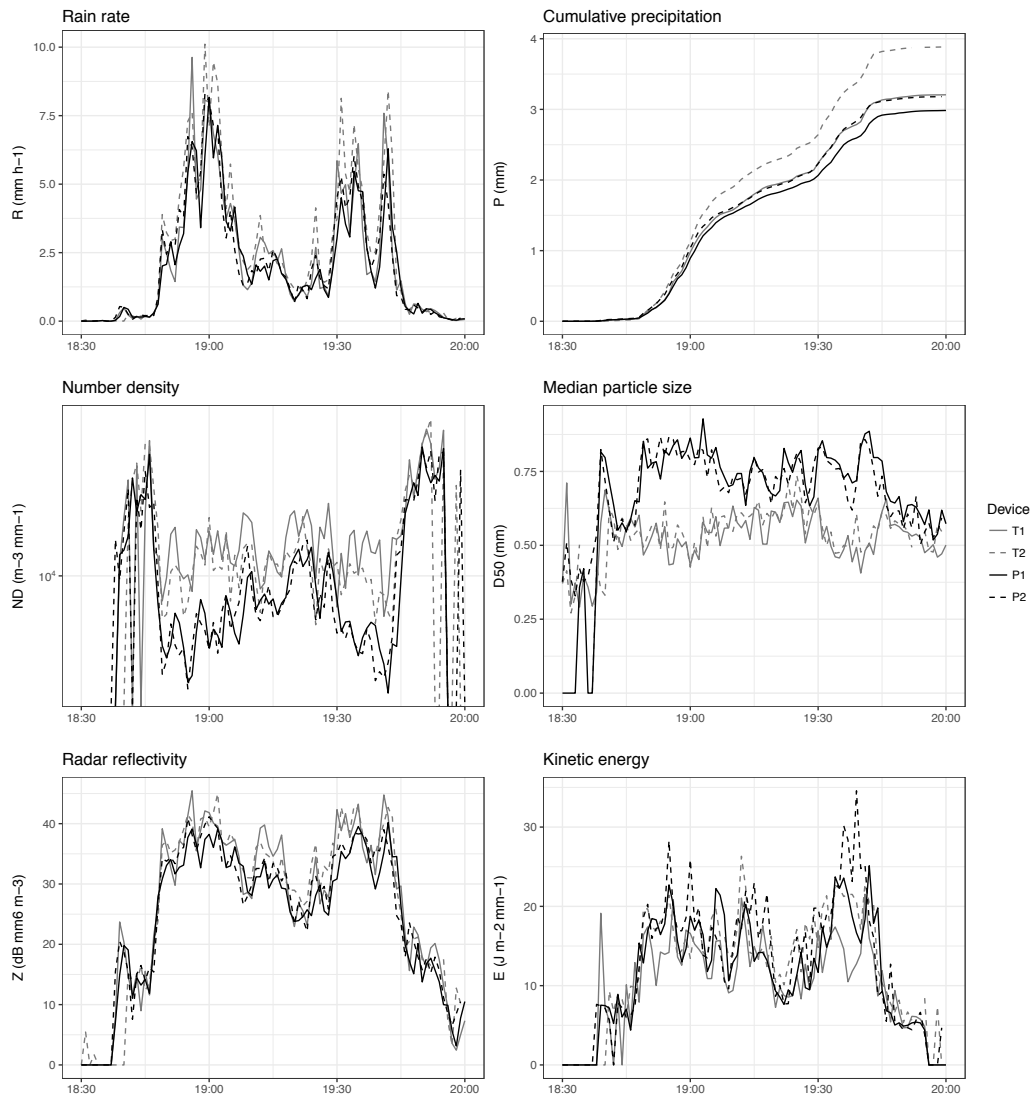

Figure 4: Time series of disdrometer bulk variables during a low-intensity event (E455, 23/02/2015).

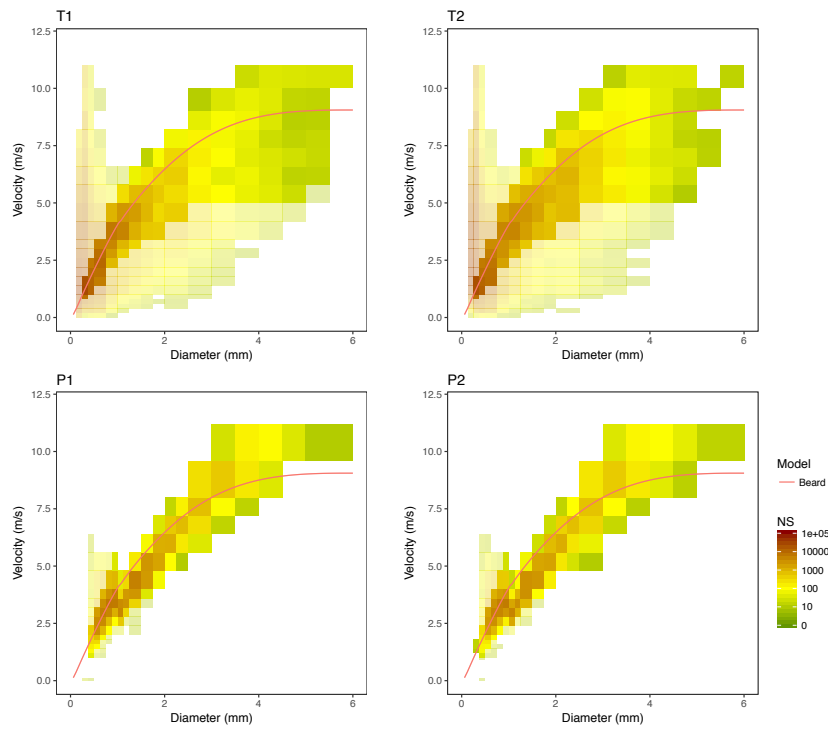

Figure 5: Particle size and velocity density (PSVD) plots of a high-intensity event (E365, 25/11/2014). The color scale indicates the number of particles for each size and velocity class (NP). Deviations larger than 50% from the theoretical terminal velocity model (Beard, 1976; red line) are indicated with a 50% transparency.

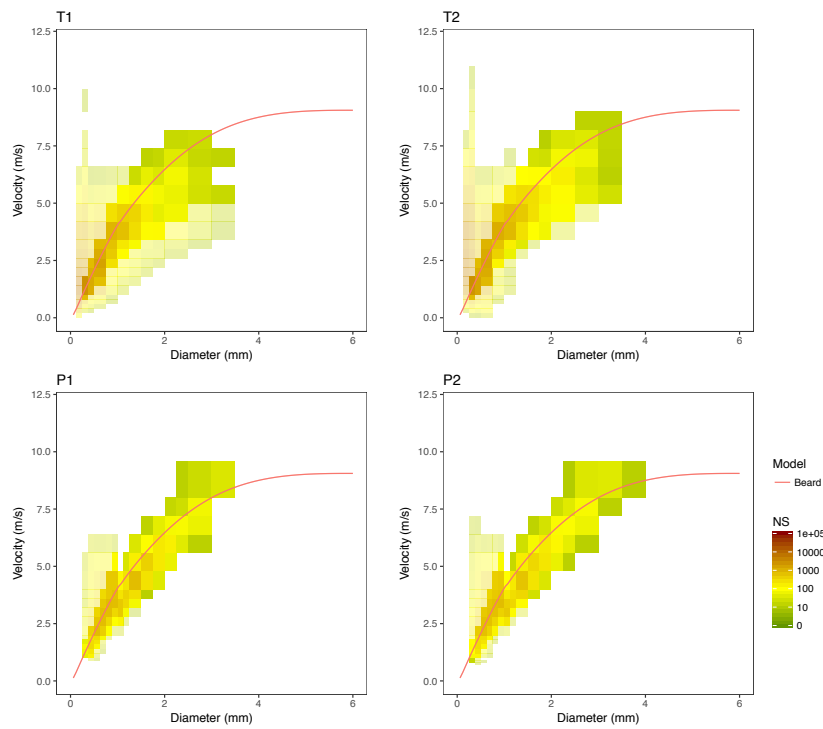

Figure 6: Particle size and velocity density (PSVD) plots of a low-intensity event (E455, 23/02/2015). Legend as in Figure 5.

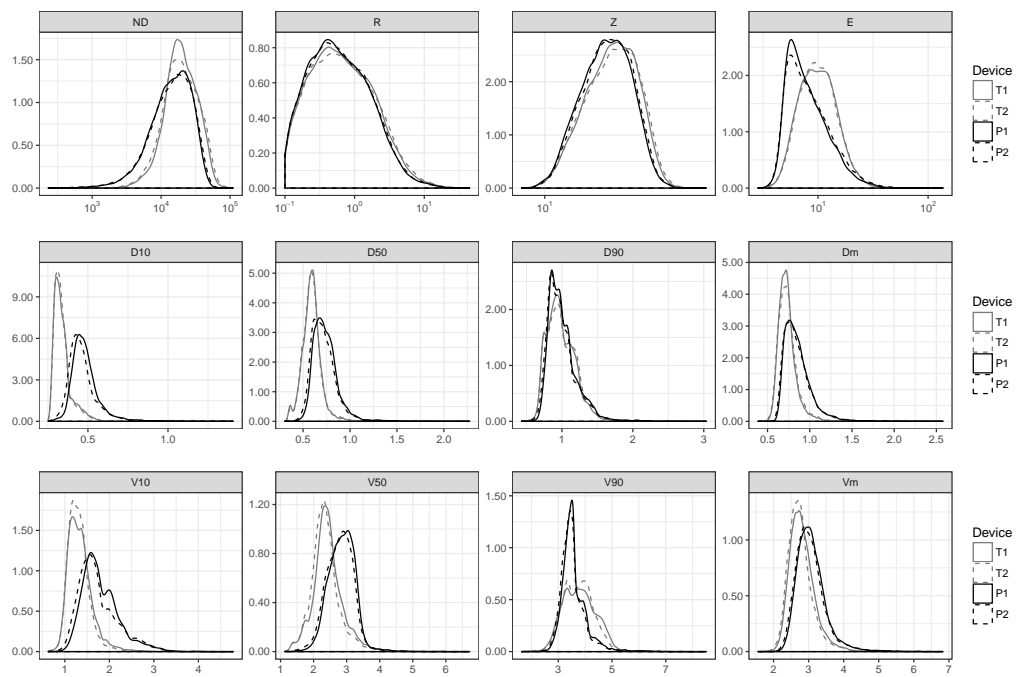

Figure 7: Kernel density plots for one-minute records.

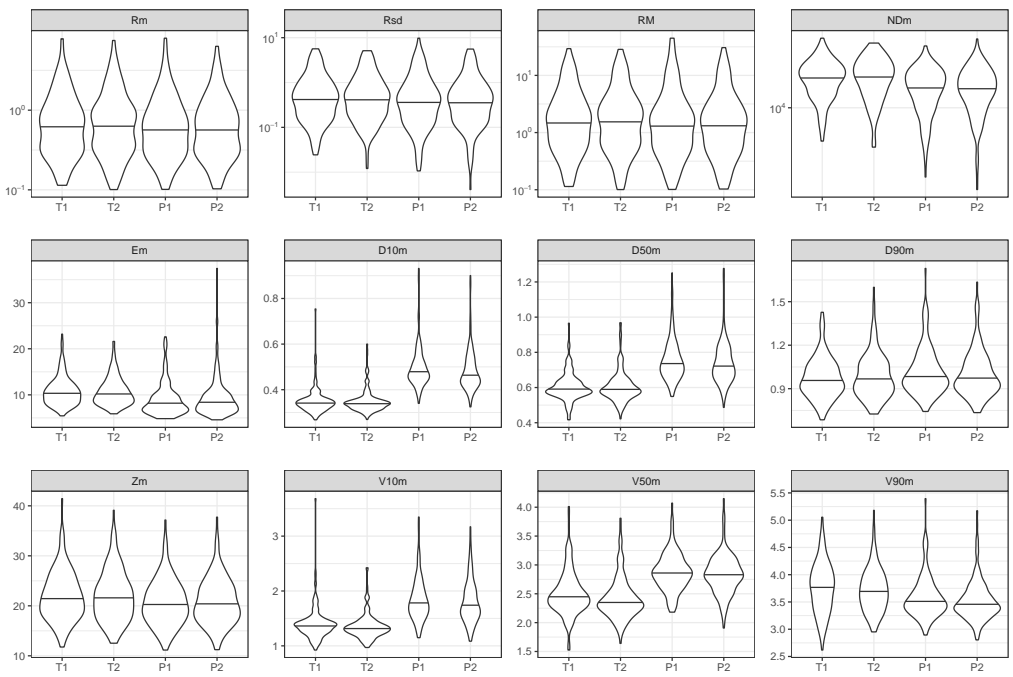

Figure 8: Violin plots for events means and maxima. Refer to Table 2 for a list of acronyms of the variables.

1072 Appendix A. Supplementary material

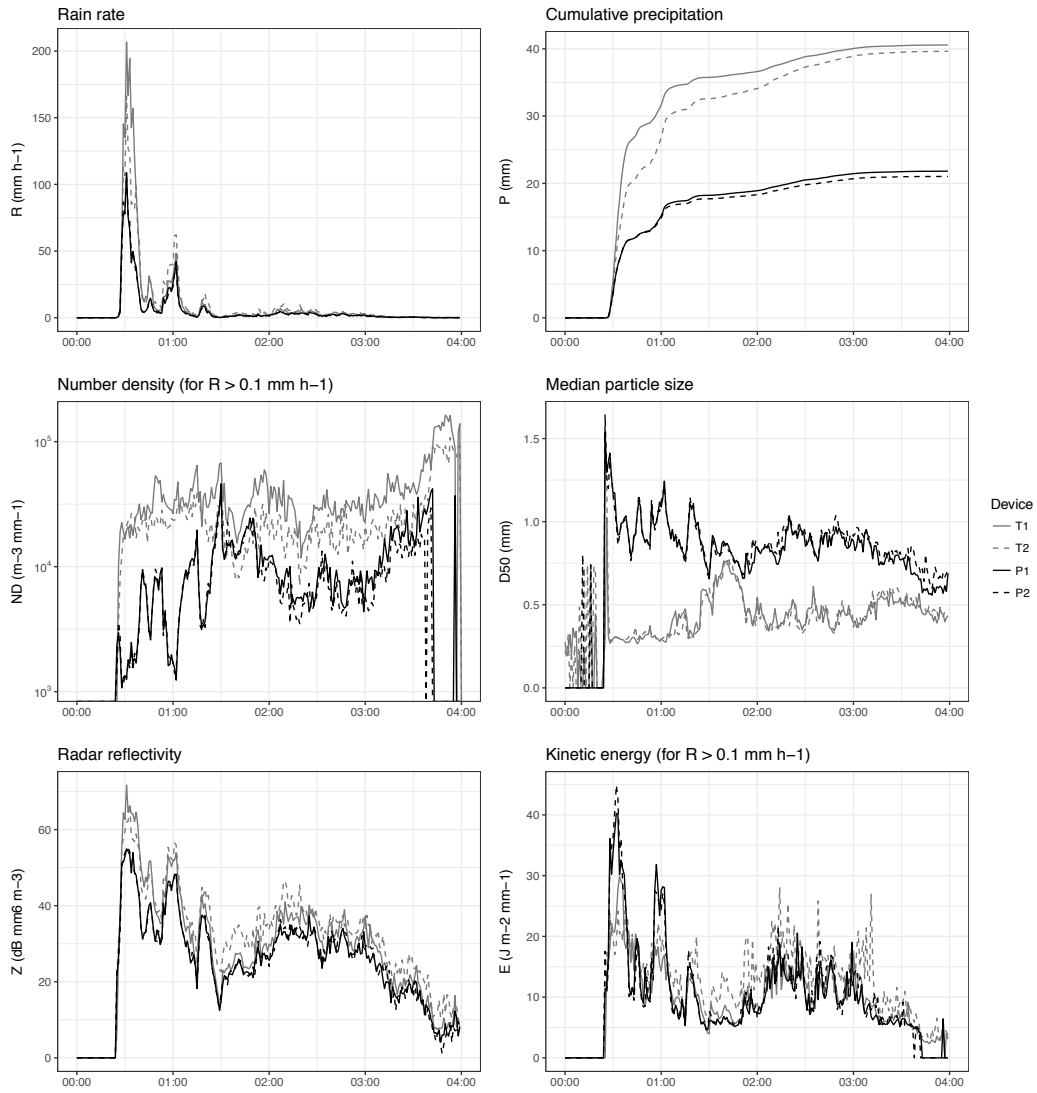

Figure A.1: Time series of disdrometer bulk variables during a high-intensity event (E365), with no corrections of the PSVD data.



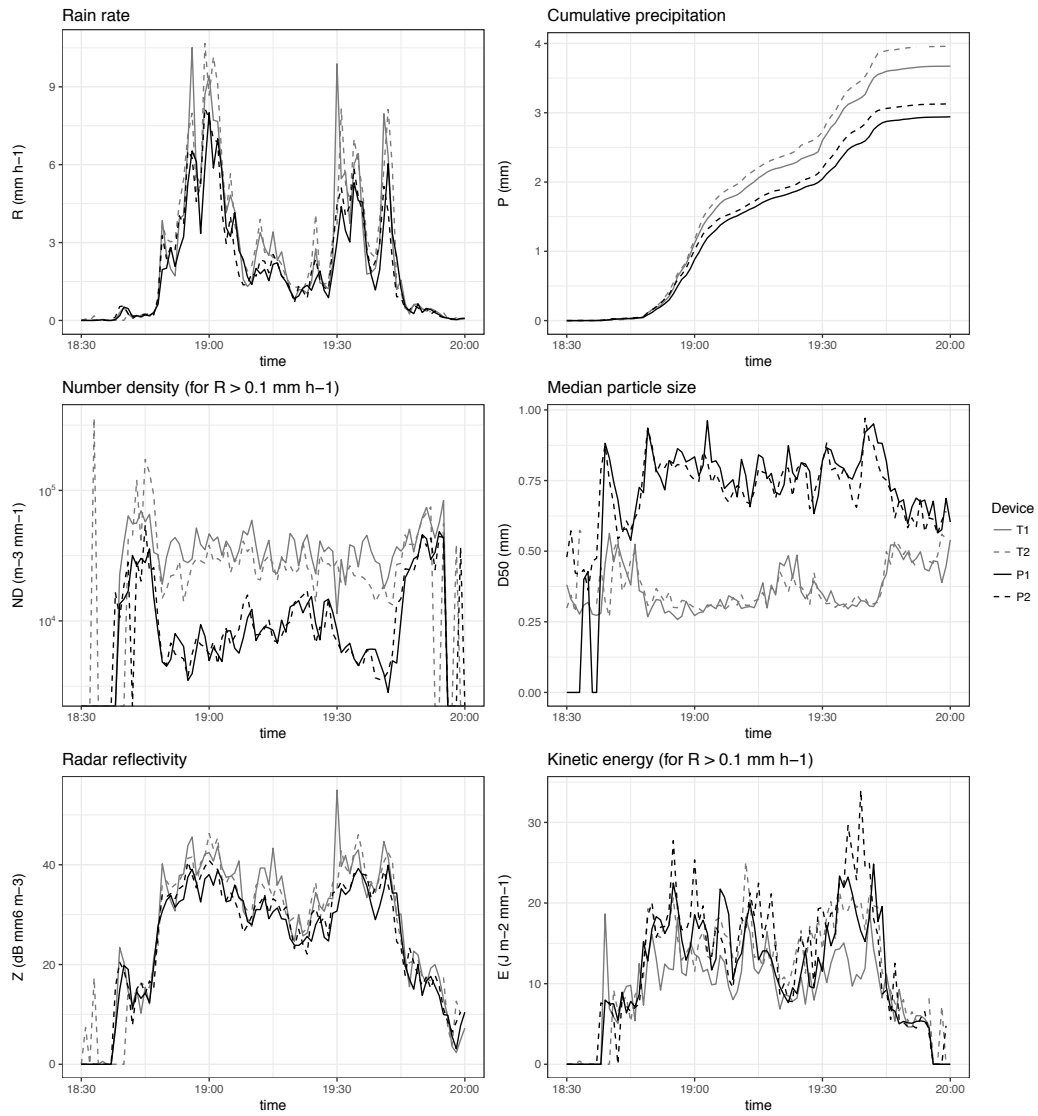

Figure A.2: Time series of disdrometer bulk variables during a low-intensity event (E455), with no corrections of the PSVD data.

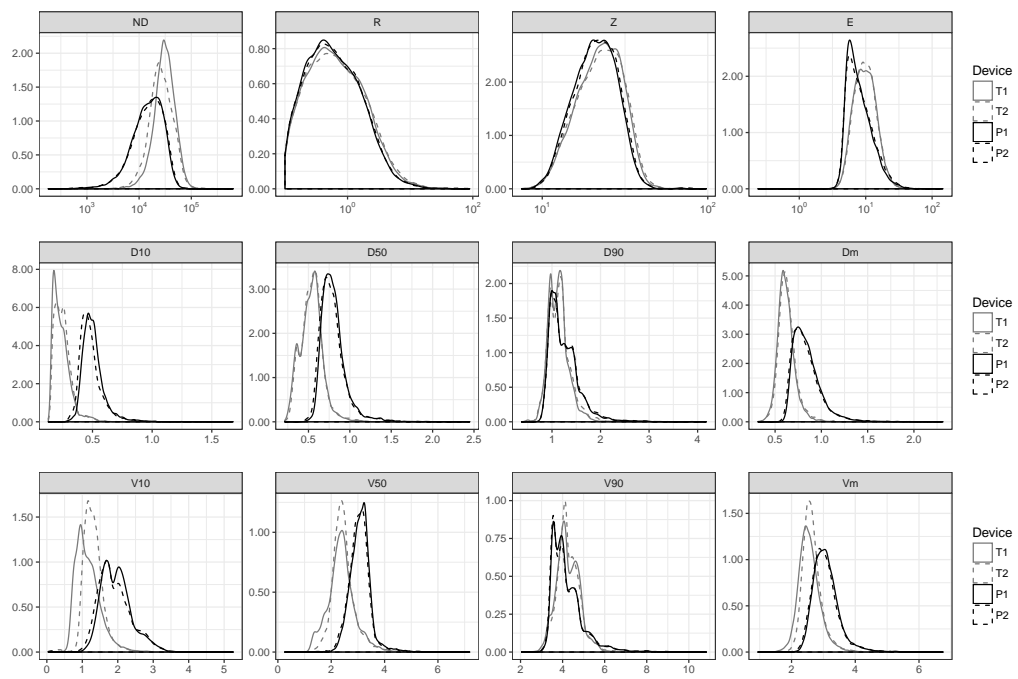

Figure A.3: Kernel density plots for one-minute records, with no corrections of the PSVD data.

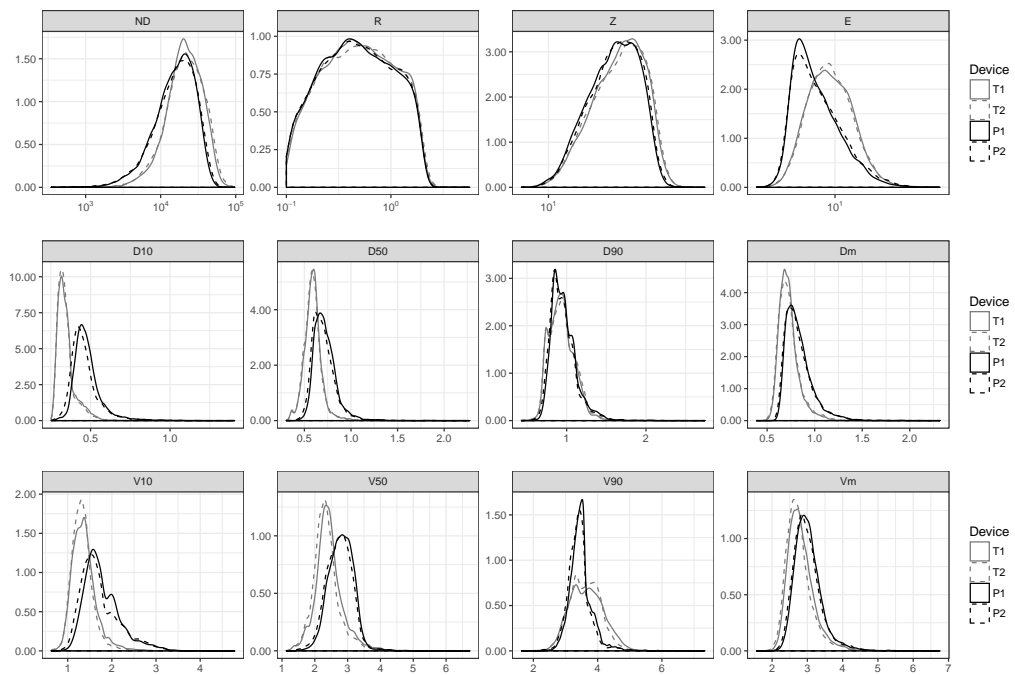

Figure A.4: Kernel density plots for low rainfall intensities ( $0.1 < I < 2 \text{ mm h}^{-1}$ ).

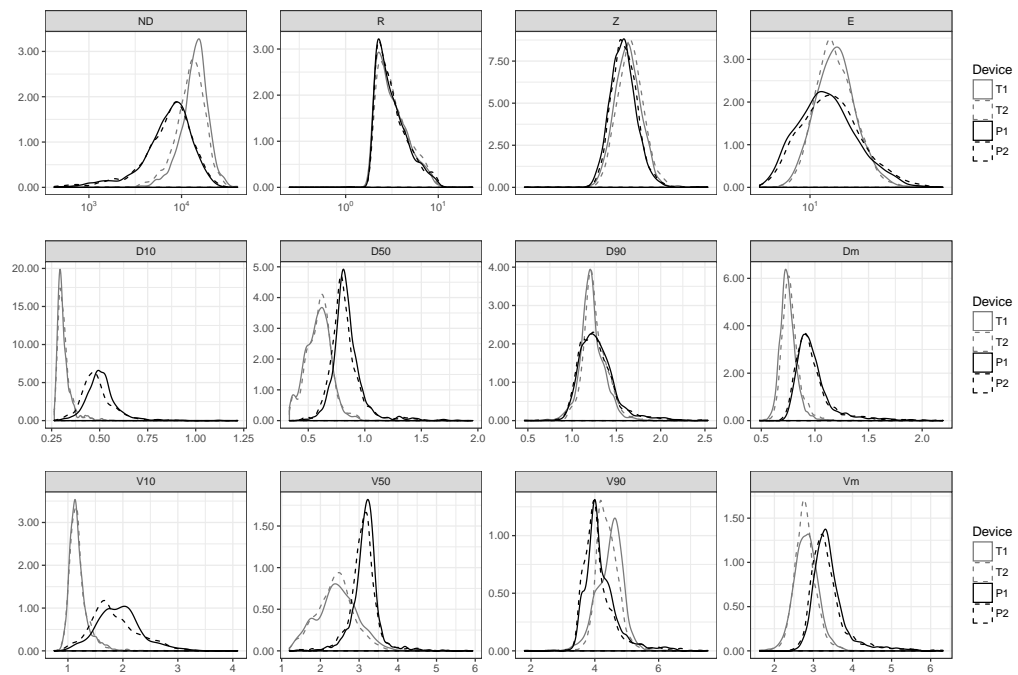

Figure A.5: Kernel density plots for medium rainfall intensities ( $2 < I < 10 \text{ mm h}^{-1}$ ).

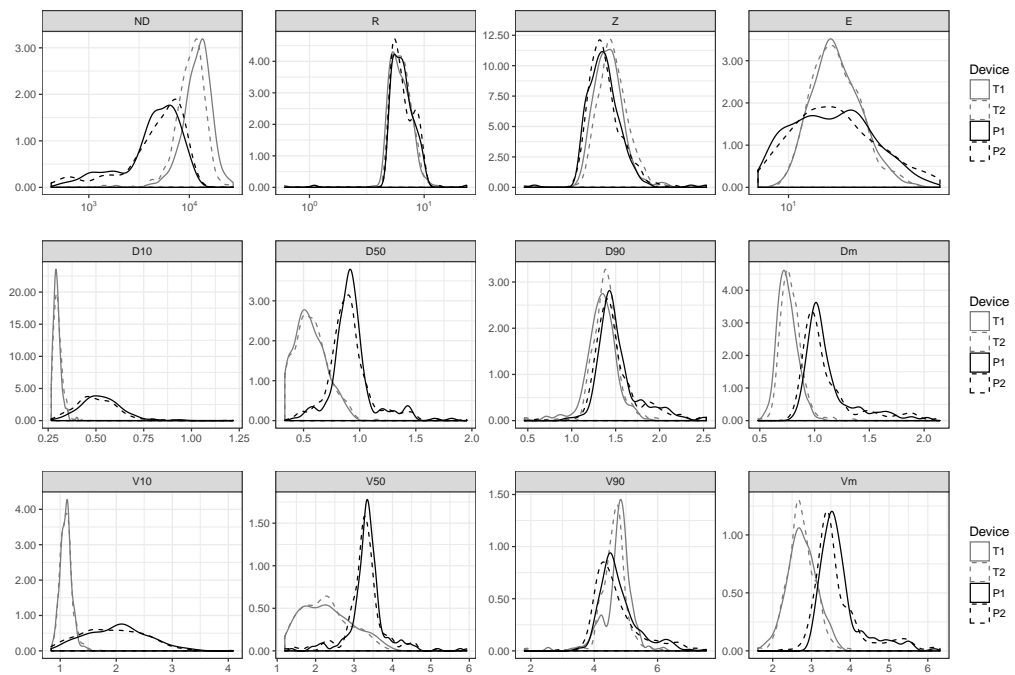

Figure A.6: Kernel density plots for high rainfall intensities ( $I > 10 \text{ mm h}^{-1}$ ).

Table A.1: Gamma Generalized Linear Mixed-Effects Model coefficients for one-minute records, with no corrections of the PSVD data ( $N = 1000$ ).

| Variable   | Fixed effects |                        |          |                        | Random effects         |           |
|------------|---------------|------------------------|----------|------------------------|------------------------|-----------|
|            | Thies         |                        | Parsivel |                        | Mast                   | Residual  |
|            | coeff         | p-value                | coeff    | p-value                | std. dev.              | std. dev. |
| <i>NP</i>  | 311           | $<2 \times 10^{-16}$   | 192      | $<2 \times 10^{-16}$   | $1.130 \times 10^{-8}$ | 1.027     |
| <i>D10</i> | 0.2409        | $<2 \times 10^{-16}$   | 0.5010   | $<2 \times 10^{-16}$   | $8.726 \times 10^{-4}$ | 0.2493    |
| <i>D50</i> | 0.5302        | $<2 \times 10^{-16}$   | 0.8040   | $<2 \times 10^{-16}$   | 0.000                  | 0.2420    |
| <i>D90</i> | 1.126         | $<2 \times 10^{-16}$   | 1.254    | $<2 \times 10^{-16}$   | 0.000                  | 0.2320    |
| <i>V10</i> | 1.199         | $<2 \times 10^{-16}$   | 1.972    | $<2 \times 10^{-16}$   | $3.062 \times 10^{-2}$ | 0.2420    |
| <i>V50</i> | 2.392         | $<2 \times 10^{-16}$   | 3.085    | $<2 \times 10^{-16}$   | 0.000                  | 0.1760    |
| <i>V90</i> | 4.215         | $<2 \times 10^{-16}$   | 4.203    | $<2 \times 10^{-16}$   | 0.000                  | 0.1641    |
| <i>R</i>   | 1.326         | $1.130 \times 10^{-4}$ | 1.183    | $8.77 \times 10^{-11}$ | 0.000                  | 1.660     |
| <i>ND</i>  | 33,370        | $<2 \times 10^{-16}$   | 17,750   | $<2 \times 10^{-16}$   | $1.246 \times 10^{-7}$ | 0.6232    |
| <i>Z</i>   | 24.00         | $<2 \times 10^{-16}$   | 22.45    | $<2 \times 10^{-16}$   | 0.000                  | 0.2968    |
| <i>E</i>   | 10.370        | $<2 \times 10^{-16}$   | 8.968    | $<2 \times 10^{-16}$   | 0.000                  | 0.4733    |
